1 Title: Innate CD8 $\alpha$ <sup>+</sup> cells and osteopontin promote ILC1-like intraepithelial lymphocyte  
2 homeostasis and intestinal inflammation

3

4 Running title: iCD8 $\alpha$  cells and osteopontin promote IEL survival and inflammation

5

6 Authors: Ali Nazmi<sup>1</sup>, Kristen Hoek<sup>1</sup>, Michael J. Greer<sup>2</sup>, M. Blanca Piazuelo<sup>3</sup>, Nagahiro Minato<sup>4</sup>  
7 and Danyvid Olivares-Villagómez<sup>1,5,6</sup>

8

9 <sup>1</sup>Department of Pathology, Microbiology and Immunology, Vanderbilt University Medical  
10 Center, Nashville, Tennessee, 37232, USA; <sup>2</sup>Department of Biomedical Informatics, Vanderbilt  
11 University, Nashville, Tennessee, 37232, USA; <sup>3</sup>Department of Medicine, Vanderbilt University  
12 Medical Center, Nashville, Tennessee, 37232, USA; <sup>4</sup>Medical Innovation Center, Graduate  
13 School of Medicine, Kyoto University, Kyoto 606-8507, Japan; <sup>5</sup>Vanderbilt Institute for  
14 Infection, Immunology and Inflammation, Vanderbilt University Medical Center, Nashville,  
15 Tennessee, 37232, USA; <sup>6</sup>ORCID, 0000-0002-1158-8976.

16

17 Corresponding author: Danyvid Olivares-Villagómez. Telephone, 615-936-0134; fax, 615-343-  
18 7392; e-mail, [danyvid.olivares-villagomez@vumc.edu](mailto:danyvid.olivares-villagomez@vumc.edu)

19 Abstract

20 Innate CD8 $\alpha$ <sup>+</sup> cells, also referred to as iCD8 $\alpha$  cells, are TCR-negative intraepithelial  
21 lymphocytes (IEL) possessing cytokine and chemokine profiles and functions related to innate  
22 immune cells. iCD8 $\alpha$  cells constitute an important source of osteopontin in the intestinal  
23 epithelium. Osteopontin is a pleiotropic cytokine with diverse roles in bone and tissue  
24 remodeling, but also has relevant functions in the homeostasis of immune cells. In this report, we  
25 present evidence for the role of iCD8 $\alpha$  cells and osteopontin in the homeostasis of TCR-negative  
26 NKp46<sup>+</sup>NK1.1<sup>+</sup> IEL (ILC1-like). We show that in the absence of iCD8 $\alpha$  cells, the number of  
27 NKp46<sup>+</sup>NK1.1<sup>+</sup> IEL is significantly reduced. These ILC1-like cells are involved in intestinal  
28 pathogenesis in the anti-CD40 mouse model of intestinal inflammation. Reduced iCD8 $\alpha$  cell  
29 numbers and/or osteopontin expression results in a milder form of intestinal inflammation in this  
30 disease model. Collectively, our results suggest that iCD8 $\alpha$  cells and osteopontin promote  
31 survival of NKp46<sup>+</sup>NK1.1<sup>+</sup> IEL, which significantly impacts the development of intestinal  
32 inflammation.

33

34 Introduction

35 Intestinal intraepithelial lymphocytes (IEL) constitute a population of cells dwelling  
36 interspersed in the monolayer of intestinal epithelial cells (IEC), and represent a unique  
37 immunological compartment in the intestines. Because of their anatomical location, IEL are  
38 considered to be the first line of defense against the enormous antigenic stimulus present in the  
39 lumen of the intestines. T cell receptor  $\alpha\beta$ <sup>+</sup> and  $\gamma\delta$ <sup>+</sup> cells constitute the great majority of IEL [1-  
40 3], and these cells possess many and varied roles during mucosal immune responses and  
41 inflammatory processes, ranging from specific immunity against pathogens, tissue repair and

42 homeostasis of the intestinal epithelium [4-9]. Lately, it has been recognized that the IEL  
43 compartment also harbors TCR<sup>neg</sup> lymphoid cells with critical roles in mucosal immune  
44 responses [3]. The great majority of TCR<sup>neg</sup> IEL is composed of cells expressing intracellular  
45 CD3 $\gamma$ , which can be divided in CD8 $\alpha\alpha^+$  or CD8 $\alpha\alpha^-$  IEL [10]. TCR<sup>neg</sup>CD8 $\alpha\alpha^+$  IEL, also referred  
46 to as innate CD8 $\alpha$  (iCD8 $\alpha$ ) cells, have been previously characterized by our group both in mice  
47 and humans [11]. iCD8 $\alpha$  cells possess a chemokine and cytokine signature, antigen processing  
48 capabilities, and other functions like bacteria uptake, that suggest that these cells are important  
49 during early immune responses [11]. Other TCR<sup>neg</sup> IEL resemble innate lymphoid cells (ILC)  
50 with differential expression of the natural cytotoxicity receptor NKp46 [12-14]. Although their  
51 function is not completely understood, NKp46<sup>+</sup>NK1.1<sup>+</sup> IEL have been shown to promote disease  
52 development in the anti-CD40 model of colitis [12].

53         The phosphoprotein osteopontin, encoded by the gene *Spp-1*, is a glycosylated molecule  
54 that was originally characterized as part of the rat bone matrix [15, 16], and later shown to  
55 induce Th1 responses, promote pathogenic Th17 survival, enhance NKT cell activation of  
56 concanavalin A-induced hepatitis, and regulate the homeostasis and function of NK cells [17-  
57 21]. A recent publication shows that lack of osteopontin results in reduced TCR $\gamma\delta$  IEL, and that  
58 this molecule enhances *in vitro* survival of TCR $\alpha\beta$  and TCR $\gamma\delta$  IEL [22]. In steady state  
59 conditions, iCD8 $\alpha$  cells express significant amounts of osteopontin [11], suggesting a potential  
60 role for these cells in IEL homeostasis. In terms of intestinal inflammation and disease,  
61 osteopontin appears to have divergent roles. For example, in DSS colitis, osteopontin appears to  
62 be beneficial during acute disease stages, whereas in chronic disease stages it is detrimental [23].  
63 In trinitrobenzene sulphonic acid-induced colitis, osteopontin enhances development of disease  
64 [24]. In humans, plasma osteopontin is increased in individuals with inflammatory bowel

65 diseases (IBD) compared to healthy controls [25, 26]. Although a report indicates that  
66 osteopontin is downregulated in the mucosa of Crohn's disease patients [27], other groups have  
67 reported higher osteopontin expression in the intestines of individuals with ulcerative colitis and  
68 Crohn's disease [26, 28]. While these results may be conflicting, they underscore the importance  
69 of osteopontin in inflammatory processes and warrant further exploration of this molecule during  
70 mucosal immune responses.

71 In this report we investigated the effect of iCD8 $\alpha$  cells as a source of osteopontin in the  
72 homeostasis of TCR<sup>neg</sup> NKp46<sup>+</sup>NK1.1<sup>+</sup> IEL and their impact in mucosal innate responses. Using  
73 mice with reduced iCD8 $\alpha$  cell numbers, we show that these cells have a critical role in  
74 NKp46<sup>+</sup>NK1.1<sup>+</sup> IEL survival, which is in part mediated by osteopontin. Disruption of  
75 NKp46<sup>+</sup>NK1.1<sup>+</sup> IEL homeostasis impacts the development of inflammatory processes in the  
76 intestines.

77

78 Materials and methods

79 *Mice.* Rag-2<sup>-/-</sup> mice in the C57BL/6 background have been in our colony for several years; these  
80 mice were originally purchased from the Jackson Laboratories. Spp-1<sup>-/-</sup> mice in the C57BL/6  
81 background were obtained from the Jackson Laboratories. E81<sup>-/-</sup> mice were graciously provided  
82 by Dr. Hilde Cheroutre. Spp-1-GFP-Knock-in mice have been previously reported [22]. To  
83 homogenize as much as possible the microbiome, all mice obtained from external sources mice  
84 were bred in our facility with Rag-2<sup>-/-</sup> mice to generate heterozygote mice for both mutations,  
85 and from these founders we obtained Spp-1<sup>-/-</sup>Rag-2<sup>-/-</sup>, E81<sup>-/-</sup>Rag-2<sup>-/-</sup>, and Rag-2<sup>-/-</sup>Spp-1-GFP-  
86 Knock-in mice. Mice were between 8 to 10-week-old. All mice were bred and housed under  
87 similar conditions. The Institutional Animal Care and Use Committee at Vanderbilt University  
88 Medical Center approved all animal procedures.

89  
90 *IEL isolation.* IEL were isolated by mechanical disruption as previously reported [29]. Briefly,  
91 after flushing the intestinal contents with cold HBSS and removing excess mucus, the intestines  
92 were cut into small pieces (~1cm long) and shaken for 45 minutes at 37°C in HBSS  
93 supplemented with 5% fetal bovine serum and 2mM EDTA. Supernatants were recovered and  
94 cells isolated using a discontinuous 40/70% Percoll (General Electric) gradient. In some  
95 experiments, IEL preparations were positively enriched using anti-CD45 or anti-CD8α magnetic  
96 beads/columns (Miltenyi).

97  
98 *Reagents and flow cytometry.* Fluorochrome-coupled anti-CD8α, -CD45, -NK1.1, and anti-  
99 NKp46 were purchased from Thermo Fisher, BD Biosciences or Tombo. Annexin V and 7AAD  
100 were purchased from BD Biosciences. All staining samples were acquired using a FACS Canto

101 II Flow System (BD Biosciences) and data analyzed using FlowJo software (Tree Star). Cell  
102 staining was performed following conventional techniques. Manufacturer's instructions were  
103 followed for Annexin V staining.

104

105 *In vitro survival assay.* Enriched CD45<sup>+</sup> IEL (1x10<sup>5</sup> cells/well) from Rag-2<sup>-/-</sup> or E8<sub>1</sub><sup>-/-</sup>Rag-2<sup>-/-</sup>  
106 mice were cultured in a 96-well flat-bottomed well plate in RPMI complemented with 10% fetal  
107 bovine serum, penicillin/streptomycin, HEPES, L-glutamine and β-mercaptoethanol in the  
108 presence or absence of 2 μg/ml of recombinant osteopontin (R&D) for 4 hours. After incubation,  
109 cells were recovered and stained for surface markers, 7AAD and annexin V. In other  
110 experiments, enriched CD45<sup>+</sup> IEL (1x10<sup>5</sup> cells/well) from Spp-1<sup>-/-</sup>Rag-2<sup>-/-</sup> mice were cultured in  
111 the presence of enriched iCD8α cells (1x10<sup>5</sup> cells/well) from Rag-2<sup>-/-</sup> mice for 4 hours. After  
112 incubation, cells were recovered and stained for surface markers, 7AAD and annexin V.

113

114 *Induction of intestinal inflammation with anti-CD40 antibodies.* Eight to ten-week-old female  
115 mice over 18g of weight were treated i.p. with 75 or 150μg of anti-mouse CD40 antibody clone  
116 FGK4.5 (Bio X Cell) as previously described [30]. Mice were weighted prior to injection and  
117 every day thereafter. Mice were monitored daily for signs of disease such as rectal bleeding,  
118 diarrhea and scruffiness. At the end point, a portion of the colon was used for pathological  
119 examination and scoring as previously reported [30]. All pathological analysis was performed by  
120 a GI pathologist (MBP) in a blind fashion. Some mice were treated with recombinant  
121 osteopontin (2 μg per mouse i.p.) or PBS at days -2, -1 and 1 pre- and post-disease induction (75  
122 μg of anti-CD40).

123

124 *Real-time PCR.* Up to 60 mg of total proximal colon was homogenized using Trizol (Invitrogen)  
125 and the RNA was isolated following conventional procedures. RNA was reverse-transcribed  
126 using the High Capacity cDNA Transcription Kit (Applied Biosystems). For real-time PCR we  
127 used the relative gene expression method [31]. GAPDH served as a normalizer. IL-23p19  
128 primers were purchased from QIAGEN and the sequence for osteopontin primers are: Forward:  
129 AGCCACAAGTTTCACAGCCACAAGG;  
130 Reverse: CTGAGAAATGAGCAGTTAGTATTCCTGC.

131  
132 *Osteopontin protein detection.* For total osteopontin present in tissue, a ~0.5 cm piece of  
133 intestine was cultured in a 24-well plate in RPMI containing 10% fetal bovine serum for 24 hrs  
134 at 37°C in 5% CO<sub>2</sub>. Supernatants were collected and cleared. In another experiment, enriched  
135 iCD8 $\alpha$  cells were cultured at 1x10<sup>5</sup> cells/well in a 96-well flat-bottomed plate for 24 hr.  
136 Osteopontin concentration was determined in the supernatants using a Quantikine ELISA kit  
137 (R&D) following manufacturer's instructions.

138  
139 *Statistical analysis.* Statistical significance between the experimental groups was determined by  
140 application of an unpaired two-tailed Student's t-test or ANOVA using Prism 7. A *p* value <0.05  
141 was considered significant.

142

143 Results

144 *iCD8 $\alpha$  cell deficiency results in decreased NKp46<sup>+</sup>NK1.1<sup>+</sup> IEL*

145 The study of the innate immune system is facilitated by analyzing mice deficient in  
146 adaptive immune cells such as Rag-2<sup>-/-</sup> mice. Analysis of the IEL compartment in these mice  
147 showed two main population of cells present in IEL preparations: a population of large cells  
148 composed primarily of IEC, and a population of smaller cells constituting lymphoid cells (Fig.  
149 1a, left dot plot). The latter population consisted primarily of CD45<sup>+</sup> cells (Fig. 1a, histogram),  
150 which could be divided in CD8 $\alpha$ <sup>+</sup> and CD8 $\alpha$ <sup>neg</sup> cells (Fig. 1a right dot plots). The former cells  
151 constituted iCD8 $\alpha$  cells and represented the majority population of innate cells in the IEL  
152 compartment of Rag-2<sup>-/-</sup> mice. Further subdivision of the CD8 $\alpha$ <sup>neg</sup> cells showed a well-defined  
153 population of NKp46<sup>+</sup>NK1.1<sup>+</sup> IEL, and other IEL with a gradient expression of NK1.1 (Fig. 1a  
154 right dot plots). The E8<sub>I</sub> enhancer region is critical for the expression of CD8 $\alpha$  homodimers in  
155 lymphoid cells present in the intestinal epithelium, without affecting other cells, such as CD8 $\alpha$ <sup>+</sup>  
156 dendritic cells [32, 33]. In a previous publication, we showed that mice deficient in E8<sub>I</sub> present a  
157 significant reduction in iCD8 $\alpha$  cells [11], and analysis of E8<sub>I</sub><sup>-/-</sup>Rag-2<sup>-/-</sup> mice recapitulated this  
158 deficiency (Fig. 1a, right dot plots). Because only iCD8 $\alpha$  cells express CD8 $\alpha$  homodimers, E8<sub>I</sub><sup>-/-</sup>  
159 Rag-2<sup>-/-</sup> mice serve as a model for iCD8 $\alpha$  cell deficiency. Interestingly, E8<sub>I</sub><sup>-/-</sup>Rag-2<sup>-/-</sup> mice  
160 presented with lower numbers of total CD45<sup>+</sup> IEL, which may account for the reduction in  
161 iCD8 $\alpha$  cells (Fig. 1b). Moreover, the IEL compartment of E8<sub>I</sub><sup>-/-</sup>Rag-2<sup>-/-</sup> mice also presented a  
162 significant reduction in the frequencies and cell numbers of NKp46<sup>+</sup>NK1.1<sup>+</sup> IEL (Fig. 1b). These  
163 cells do not express CD8 $\alpha$  homodimers (Fig. 1a, right dot plots) and therefore the decrease in  
164 numbers is not directly related with the E8<sub>I</sub> mutation.

165



166 *Osteopontin expression in the IEL compartment is primarily associated with iCD8 $\alpha$  cells*

167 Osteopontin is a pleiotropic cytokine that has been reported to sustain homeostasis of lymphoid

168 cells, including NK cells [19] and concanavalin A activated T cells [18]. Because iCD8 $\alpha$  cells

169 have been reported to be a source of osteopontin, we reasoned that the significant absence of

170 these cells in E8 $\beta$ <sup>-/-</sup>Rag-2<sup>-/-</sup> mice may result in decrease osteopontin production in the intestines.

171 Indeed, the expression of osteopontin mRNA in the intestines of Rag-2<sup>-/-</sup> mice was significantly

172 higher than that observed in the intestines of E8 $\beta$ <sup>-/-</sup>Rag-2<sup>-/-</sup> mice (Fig. 2a). To investigate

173 osteopontin production in the IEL compartment, we analyzed Rag-2<sup>-/-</sup> mice carrying the Spp-1-

174 EGFP knock-in reporter gene [22]. Whereas NKp46<sup>+</sup>NK1.1<sup>+</sup> and other CD8 $\alpha$ <sup>-</sup> IEL (NKp46<sup>-</sup>

175 NK1.1<sup>lo/-</sup>) presented low GFP staining, most iCD8 $\alpha$  cells showed high GFP expression (Fig. 2b),

176 indicating that iCD8 $\alpha$  cells are a key source of osteopontin within innate IEL, and corroborate

177 the reduction of this cytokine in mice deficient in iCD8 $\alpha$  cells (Fig. 2a).

178

179 *iCD8 $\alpha$  cells and osteopontin promote survival of NKp46<sup>+</sup>NK1.1<sup>+</sup> IEL*

180 The above results suggest that iCD8 $\alpha$  cell-derived osteopontin is important for

181 maintaining normal levels of NKp46<sup>+</sup>NK1.1<sup>+</sup> cells. One possibility is that osteopontin promotes

182 the survival of these IEL. To test this hypothesis, total enriched-CD45<sup>+</sup> IEL from Rag-2<sup>-/-</sup> mice

183 were cultured for 4 hours in the presence or absence of recombinant osteopontin, and the survival

184 of NKp46<sup>+</sup>NK1.1<sup>+</sup> IEL was determined by 7AAD and annexin V staining. As shown in Fig. 3a,

185 recombinant osteopontin did not affect annexin V levels in NKp46<sup>+</sup>NK1.1<sup>+</sup> IEL derived from

186 Rag-2<sup>-/-</sup> mice, suggesting that osteopontin produced by cells present in the culture (like iCD8 $\alpha$

187 cells, which are the main producers of osteopontin in the intestinal epithelium, Fig.2b) was

188 sufficient to maintain survival, while addition of exogenous osteopontin did not improve

189 survival. However, when enriched CD45<sup>+</sup> IEL derived from E81<sup>-/-</sup>Rag-2<sup>-/-</sup> mice (deficient in  
190 iCD8 $\alpha$  cells) were cultured in the presence of recombinant osteopontin, the levels of annexin V  
191 staining were lower than in cells cultured in the absence of recombinant osteopontin (Fig. 3b),  
192 which suggests that the addition of osteopontin contributes to the survival of NKp46<sup>+</sup>NK1.1<sup>+</sup>  
193 IEL from E81<sup>-/-</sup>Rag-2<sup>-/-</sup> mice. To determine the role of iCD8 $\alpha$  cells in NKp46<sup>+</sup>NK1.1<sup>+</sup> IEL  
194 survival, CD45<sup>+</sup> IEL from Spp-1<sup>-/-</sup>Rag-2<sup>-/-</sup> mice were cultured in the presence or absence of  
195 iCD8 $\alpha$  cells from Rag-2<sup>-/-</sup> mice, which produce osteopontin. As seen in Fig. 3c, addition of  
196 iCD8 $\alpha$  cells decreased the level of annexin V staining in NKp46<sup>+</sup>NK1.1<sup>+</sup> IEL, indicating that  
197 iCD8 $\alpha$  cells promote the survival of NKp46<sup>+</sup>NK1.1<sup>+</sup> IEL.

198 Overall, these results indicate that both, iCD8 $\alpha$  cells and osteopontin, have an important  
199 role in the homeostasis of NKp46<sup>+</sup>NK1.1<sup>+</sup> IEL.

200

### 201 *Osteopontin kinetics during intestinal inflammation*

202 To investigate the kinetics of osteopontin production during intestinal inflammation, we  
203 used the anti-CD40 model of colitis, in which treatment of T and B cell deficient mice (e.g. Rag-  
204 2<sup>-/-</sup>) with anti-CD40 results in weight loss, loose stools, rectal bleeding and inflammation of the  
205 colon mediated by IL-23 [30]. This system represents a good model for the analysis of innate  
206 immune responses during intestinal inflammation. We treated Rag-2<sup>-/-</sup> mice with anti-CD40 and  
207 2 days after, osteopontin protein levels were measured in colon tissue or enriched-iCD8 $\alpha$  cells.  
208 Osteopontin was readily detected either in total colon (Fig. 4a) or iCD8 $\alpha$  cells (Fig. 4b) derived  
209 from anti-CD40-treated mice in comparison to naïve animals. To determine the kinetics of  
210 osteopontin expression in the intestinal epithelium during inflammation, we treated Rag-2<sup>-/-</sup>Spp-  
211 1-EGFP knock-in reporter mice with anti-CD40. The expression of osteopontin in iCD8 $\alpha$  cells

212 remained constant 3-and 7-days after disease induction, whereas expression of osteopontin in  
213 NKp46<sup>+</sup>NK1.1<sup>+</sup> IEL increased at 3- and 7-days post-treatment (Fig. 4c). On the other hand,  
214 expression of osteopontin in other IEL populations (represented as CD8 $\alpha$ :NKp46<sup>-</sup>NK1.1<sup>lo/-</sup>)  
215 decreased during the course of the disease (Fig. 4c). These results indicate that during anti-  
216 CD40-induced colitis, iCD8 $\alpha$  cells, and to a lesser extent NKp46<sup>+</sup>NK1.1<sup>+</sup> IEL comprise  
217 significant sources of osteopontin in the intestinal epithelium.

218

### 219 *Osteopontin promotes intestinal inflammation*

220 The increase in osteopontin production observed during anti-CD40-induced colitis  
221 suggests an important role for this cytokine in disease development. To test this hypothesis, we  
222 treated Rag-2<sup>-/-</sup> and osteopontin-deficient Rag-2<sup>-/-</sup> (Spp-1<sup>-/-</sup>Rag-2<sup>-/-</sup>) mice with anti-CD40 and  
223 monitored the mice for 7 days. As expected, Rag-2<sup>-/-</sup> mice lost weight starting at day 1 post  
224 treatment, which was also observed in Spp-1<sup>-/-</sup>Rag-2<sup>-/-</sup> mice (Fig. 5a). However, after day 2, Spp-  
225 1<sup>-/-</sup>Rag-2<sup>-/-</sup> mice showed significantly decreased weight loss in comparison to Rag-2<sup>-/-</sup> mice, and  
226 presented less colon pathology at the end of the experiment (Fig. 5b). The decrease in disease  
227 observed was accompanied by reduced levels of IL-23 expression in the colon (Fig. 5c). These  
228 results indicate that osteopontin is detrimental in this model of intestinal inflammation.

229 Interestingly, the numbers of iCD8 $\alpha$  cells and NKp46<sup>+</sup>NK1.1<sup>+</sup> IEL in naïve Spp-1<sup>-/-</sup>Rag-  
230 2<sup>-/-</sup> mice were comparable to those observed in Rag-2<sup>-/-</sup> animals (Fig. 5d), suggesting that the  
231 absence of osteopontin has a greater influence in disease development than in the reduction of  
232 NKp46<sup>+</sup>NK1.1<sup>+</sup> IEL numbers.

233

### 234 *Decreased intestinal inflammation in mice deficient in iCD8 $\alpha$ cells*

235 To investigate whether iCD8 $\alpha$  IEL deficiency has an impact in intestinal inflammation, we  
236 treated E81<sup>-/-</sup>Rag-2<sup>-/-</sup> mice and control Rag-2<sup>-/-</sup> mice with anti-CD40. E81<sup>-/-</sup>Rag-2<sup>-/-</sup> mice lost less  
237 weight throughout the course of the experiment (Fig. 6a) and presented less colon pathology  
238 (Fig. 6b), mirroring the observed results in Spp-1<sup>-/-</sup>Rag-2<sup>-/-</sup> mice (Fig. 5a). Analysis of the  
239 kinetics of osteopontin expression in the colon of anti-CD40-treated Rag-2<sup>-/-</sup> and E81<sup>-/-</sup>Rag-2<sup>-/-</sup>  
240 mice showed incremental expression of osteopontin mRNA at day 2 and 7 post disease  
241 induction; however, the levels of osteopontin mRNA levels were consistently lower in E81<sup>-/-</sup>Rag-  
242 2<sup>-/-</sup> mice than in Rag-2<sup>-/-</sup> mice (Fig. 6c). To investigate whether treatment with osteopontin  
243 increases disease severity in iCD8 $\alpha$  cell-deficient mice, E81<sup>-/-</sup>Rag-2<sup>-/-</sup> mice were injected i.p. at  
244 day -2, -1, and 0 with recombinant osteopontin, followed by disease induction with a reduced  
245 dose of anti-CD40 at day 0 (a lower dose was chosen to better detect changes in disease  
246 severity). Rag-2<sup>-/-</sup> control mice lost similar weight with low anti-CD40 than mice treated with the  
247 regular dose (compare Fig. 6a and 6d); however, E81<sup>-/-</sup>Rag-2<sup>-/-</sup> mice treated with low anti-CD40  
248 recovered faster than E81<sup>-/-</sup>Rag-2<sup>-/-</sup> mice treated with the full anti-CD40 dose (compare Fig. 6a  
249 and 6d). Although, E81<sup>-/-</sup>Rag-2<sup>-/-</sup> mice treated with recombinant osteopontin presented weight  
250 loss similar to PBS-treated E81<sup>-/-</sup>Rag-2<sup>-/-</sup> mice during the first few days after disease induction,  
251 the former group did not recover as the PBS-treated group and their weights were more similar to  
252 Rag-2<sup>-/-</sup> control mice. (Fig. 6d). Although colon pathological scores were comparable between  
253 the control and recombinant osteopontin-treated E81<sup>-/-</sup>Rag-2<sup>-/-</sup> groups, there was a tendency for  
254 higher disease severity in the latter group. Therefore, our results indicate that administration of  
255 osteopontin slightly increases disease severity in the absence of iCD8 $\alpha$  cells and low osteopontin  
256 expression in the colon.

257

258 Discussion

259 Osteopontin is known to be widely expressed in the intestinal mucosa of ulcerative colitis and  
260 Crohn's disease patients, and in the latter group, osteopontin plasma levels are increased in  
261 comparison to control individuals [26, 34], suggesting an involvement of this molecule in the  
262 pathology of inflammatory bowel diseases. However, the role of osteopontin in mouse models of  
263 intestinal inflammation is controversial. In the DSS model of colitis, reports vary about the role  
264 of osteopontin, either as a pro or anti-inflammatory factor [23, 34-36]. Moreover, in the  
265 trinitrobenzene sulphonic acid-induced model of colitis, osteopontin-deficient mice fare better  
266 than wild type animals, suggesting a pro-inflammatory role for this cytokine [37]. In contrast, in  
267 the IL-10-deficiency model of spontaneous intestinal inflammation, IL-10<sup>-/-</sup>Spp-1<sup>-/-</sup> mice develop  
268 disease faster than IL-10<sup>-/-</sup> control mice [36]. Finally, adoptive transfer of naïve CD62L<sup>hi</sup>CD4<sup>+</sup> T  
269 cells into Rag-2<sup>-/-</sup>Spp-1<sup>-/-</sup> mice resulted in less chronic colitis than Rag-2<sup>-/-</sup> recipient mice [38].  
270 How to reconcile these diverse observations? It is possible that osteopontin's impact varies  
271 depending on the primary cell populations responsible for disease induction or the disease stage.  
272 For example, here we propose that iCD8 $\alpha$  cells, via osteopontin, promote the survival of pro-  
273 inflammatory NKp46<sup>+</sup>NK1.1<sup>+</sup> IEL during acute colitis, whereas in other disease models  
274 osteopontin may differentially impact acute and chronic inflammation [23]. Therefore, dissecting  
275 how osteopontin affects different branches of the mucosal immune system during steady state  
276 levels and inflammatory processes is of critical relevance to increase our understanding of IEL  
277 biology and osteopontin function, as well as the impact of this cytokine in diseases such as  
278 ulcerative colitis and Crohn's disease.

279 IEL reside in a unique anatomical location intercalated between IEC, and in close  
280 proximity to the contents of the intestinal lumen. This location makes a unique niche for IEL. In

281 this environment, IEL are most likely subjected to distinctive signals during steady-state levels as  
282 well as during intestinal immune responses. In addition, IEL represent a heterogeneous  
283 population of lymphocytes with different developmental origins and immunological roles [1-3],  
284 and because of this diversity, each IEL population may be subjected to particular environmental  
285 clues. How different IEL populations survive and maintain homeostasis in the intestinal  
286 epithelium is not very well understood. In this report, we examine the role of a novel IEL  
287 population referred to as iCD8 $\alpha$  cells and the pleiotropic cytokine osteopontin in the homeostasis  
288 of NKp46<sup>+</sup>NK1.1<sup>+</sup> IEL. iCD8 $\alpha$  cells promote clearance of the colitis-inducing pathogen  
289 *Citrobacter rodentium* [11], but also exacerbate colitis via granzymes when not properly  
290 regulated [39]. The results presented in this report add a new role for iCD8 $\alpha$  IEL as a population  
291 promoting the survival of NKp46<sup>+</sup>NK1.1<sup>+</sup> IEL via osteopontin.

292         Although most of the IEL studies have primarily focused on TCR<sup>+</sup> IEL (TCR $\alpha\beta$  and  $\gamma\delta$ ),  
293 recently it has become apparent that TCR<sup>neg</sup> IEL constitute an important fraction of the IEL  
294 compartment. Three distinct TCR<sup>neg</sup> IEL populations have been characterized to date: iCD3<sup>+</sup>,  
295 iCD8 $\alpha$ , and ILC-like IEL [10, 12-14]. iCD3<sup>+</sup> and iCD8 $\alpha$  cells appear to be related IEL  
296 populations that require IL-15 for their development. How the homeostasis of these cells is  
297 maintained in the intestinal epithelium is not clearly understood. There is evidence suggesting  
298 that the thymus leukemia (TL) antigen, a ligand for CD8 $\alpha\alpha$  homodimers [40, 41], is needed for  
299 maintenance of iCD8 $\alpha$  cells [11]. Some ILC-like IEL require IL-15 for their survival, such as  
300 NKp46-negative IEL [14]. Although osteopontin deficient mice present similar numbers of  
301 NKp46<sup>+</sup>NK1.1<sup>+</sup> IEL (Fig. 5d), their numbers are significantly decreased in mice deficient in  
302 iCD8 $\alpha$  cells and reduced intestinal osteopontin (E81<sup>-/-</sup>Rag-2<sup>-/-</sup> mice). These observations raise the

303 possibility that iCD8 $\alpha$  cells support NKp46<sup>+</sup>NK1.1<sup>+</sup> IEL homeostasis by unknown mechanisms  
304 in addition to osteopontin.

305 Our *in vivo* evidence presented in this report indicates that iCD8 $\alpha$  cells represent one of  
306 the innate IEL populations with highest levels of osteopontin expression, and that mice deficient  
307 in iCD8 $\alpha$  cells also present decreased osteopontin levels in the colon (Fig. 2a). These results  
308 suggest a putative role for iCD8 $\alpha$  cells as a source of osteopontin in the intestinal epithelium,  
309 allowing proper survival of other IEL in steady state conditions. Although NKp46<sup>+</sup>NK1.1<sup>+</sup> IEL  
310 do not produce osteopontin during steady state conditions, the expression of this cytokine  
311 incrementally appears at day 3 and 7 post anti-CD40 treatment. At this moment, the significance  
312 of NKp46<sup>+</sup>NK1.1<sup>+</sup> IEL-derived osteopontin during inflammation is unknown.

313 It is important to mention that in order to study innate IEL, our results are based on mice  
314 lacking TCR<sup>+</sup> IEL, and therefore, we do not discard the possibility that some TCR<sup>+</sup> IEL may be  
315 osteopontin producers in wild type mice. Indeed, in steady state conditions, using an osteopontin-  
316 GFP reporter system, Hattori's group showed that TCR<sup>+</sup>CD8 $\alpha$ <sup>+</sup> IEL represent a source of  
317 osteopontin in the intestines of wild type mice [22]. This group also showed that TCR $\gamma\delta$ <sup>+</sup> IEL *in*  
318 *vivo* are dependent on osteopontin for their survival, whereas in *in vitro* conditions, both  
319 TCR $\alpha\beta$ <sup>+</sup> and  $\gamma\delta$ <sup>+</sup> IEL survival is blunted by anti-osteopontin antibodies. Although, the report by  
320 Hattori's group and our results presented herein clearly indicate an important role for osteopontin  
321 in IEL survival, there is still a significant gap in knowledge about the homeostasis of IEL  
322 subpopulations, such as TCR $\beta$ <sup>+</sup>CD4<sup>+</sup>, TCR $\beta$ <sup>+</sup>CD4<sup>+</sup>CD8 $\alpha\alpha$ <sup>+</sup>, TCR $\beta$ <sup>+</sup>CD8 $\alpha\beta$ <sup>+</sup>, TCR $\beta$ <sup>+</sup>CD8 $\alpha\alpha$ <sup>+</sup>  
323 and CD8 $\alpha\alpha$ <sup>neg</sup>iCD3<sup>+</sup> cells; similarly, it is unknown whether human IEL require osteopontin for  
324 their survival/homeostasis. Another outstanding question is the receptor used by osteopontin to

325 stimulate IEL. One possible candidate is CD44, a molecule expressed in activated T cells, with  
326 the capacity of binding osteopontin [42].

327 It is poorly investigated whether different population of IEL interact with each other.

328 There are few reports that indirectly suggest that this could be the case, for example, TCR $\gamma\delta$  IEL  
329 control the activation status and numbers of TCR $\alpha\beta^+$ CD8 $\alpha\beta^+$  IEL in humans [43], whereas  
330 iCD8 $\alpha$  cells may present antigen to CD4 $^+$  IEL in an MHC class II restricted fashion [11].

331 Although our results do not provide direct evidence showing interaction between iCD8 $\alpha$  cells  
332 and NKp46 $^+$ NK1.1 $^+$  IEL in the intestinal epithelium, IEL may either directly interact with each  
333 other or may communicate via cytokines and/or other factors. However, more research needs to  
334 be done to have a better understanding of IEL-IEL interactions.

335 In conclusion, in this report we provide evidence indicating an important and novel role  
336 for iCD8 $\alpha$  cells in the homeostasis of NKp46 $^+$ NK1.1 $^+$  IEL. We also show that the effect of  
337 iCD8 $\alpha$  cells is mediated in part by osteopontin, which adds to the growing roles of this cytokine  
338 in different biological processes.

339

340 Acknowledgements: We thank the Translational Pathology Shared Resource for tissue  
341 processing. This work was supported by NIH grant R01DK111671 (to D.O-V.); Careers in  
342 Immunology Fellowship Program from the American Association of Immunologist (to D.O-V.  
343 and A.N.); National Library of Medicine T15 LM00745 grant (to M.J.G.); and scholarships from  
344 the Digestive Disease Research Center at Vanderbilt University Medical Center supported by  
345 NIH grant P30DK058404.

346

347



348 References

- 349 1. Van Kaer L, Olivares-Villagomez D. Development, Homeostasis, and Functions of  
350 Intestinal Intraepithelial Lymphocytes. *J Immunol.* 2018;200(7):2235-44. Epub 2018/03/21. doi:  
351 10.4049/jimmunol.1701704. PubMed PMID: 29555677; PubMed Central PMCID:  
352 PMCPMC5863587.
- 353 2. Cheroutre H. Starting at the beginning: new perspectives on the biology of mucosal T  
354 cells. *Annu Rev Immunol.* 2004;22:217-46. PubMed PMID: 15032579.
- 355 3. Olivares-Villagomez D, Van Kaer L. Intestinal Intraepithelial Lymphocytes: Sentinels of  
356 the Mucosal Barrier. *Trends Immunol.* 2017. Epub 2017/12/10. doi: 10.1016/j.it.2017.11.003.  
357 PubMed PMID: 29221933.
- 358 4. Chen Y, Chou K, Fuchs E, Havran WL, Boismenu R. Protection of the intestinal mucosa  
359 by intraepithelial gamma delta T cells. *Proc Natl Acad Sci U S A.* 2002;99(22):14338-43.  
360 PubMed PMID: 12376619.
- 361 5. Das G, Augustine MM, Das J, Bottomly K, Ray P, Ray A. An important regulatory role  
362 for CD4+CD8 alpha alpha T cells in the intestinal epithelial layer in the prevention of  
363 inflammatory bowel disease. *Proc Natl Acad Sci U S A.* 2003;100(9):5324-9. PMC1535703.  
364 PubMed PMID: 12695566.
- 365 6. Guy-Grand D, DiSanto JP, Henchoz P, Malassis-Seris M, Vassalli P. Small bowel  
366 enteropathy: role of intraepithelial lymphocytes and of cytokines (IL-12, IFN-gamma, TNF) in  
367 the induction of epithelial cell death and renewal. *Eur J Immunol.* 1998;28(2):730-44. PubMed  
368 PMID: 9521083.

- 369 7. Inagaki-Ohara K, Chinen T, Matsuzaki G, Sasaki A, Sakamoto Y, Hiromatsu K, et al.  
370 Mucosal T cells bearing TCRgammadelta play a protective role in intestinal inflammation. *J*  
371 *Immunol.* 2004;173(2):1390-8. PubMed PMID: 15240735.
- 372 8. Lepage AC, Buzoni-Gatel D, Bout DT, Kasper LH. Gut-derived intraepithelial  
373 lymphocytes induce long term immunity against *Toxoplasma gondii*. *J Immunol.*  
374 1998;161(9):4902-8. PubMed PMID: 9794424.
- 375 9. Masopust D, Jiang J, Shen H, Lefrancois L. Direct analysis of the dynamics of the  
376 intestinal mucosa CD8 T cell response to systemic virus infection. *J Immunol.*  
377 2001;166(4):2348-56. PubMed PMID: 11160292.
- 378 10. Etersperger J, Montcuquet N, Malamut G, Guegan N, Lopez-Lastra S, Gayraud S, et al.  
379 Interleukin-15-Dependent T-Cell-like Innate Intraepithelial Lymphocytes Develop in the  
380 Intestine and Transform into Lymphomas in Celiac Disease. *Immunity.* 2016;45(3):610-25. Epub  
381 2016/09/11. doi: 10.1016/j.immuni.2016.07.018. PubMed PMID: 27612641.
- 382 11. Van Kaer L, Algood HM, Singh K, Parekh VV, Greer MJ, Piazuelo MB, et al.  
383 CD8alphaalpha(+) Innate-Type Lymphocytes in the Intestinal Epithelium Mediate Mucosal  
384 Immunity. *Immunity.* 2014;41(3):451-64. Epub 2014/09/16. doi: 10.1016/j.immuni.2014.08.010.  
385 PubMed PMID: 25220211; PubMed Central PMCID: PMC4169715.
- 386 12. Fuchs A, Vermi W, Lee JS, Lonardi S, Gilfillan S, Newberry RD, et al. Intraepithelial  
387 type 1 innate lymphoid cells are a unique subset of IL-12- and IL-15-responsive IFN-gamma-  
388 producing cells. *Immunity.* 2013;38(4):769-81. Epub 2013/03/05. doi:  
389 10.1016/j.immuni.2013.02.010. PubMed PMID: 23453631; PubMed Central PMCID:  
390 PMC3634355.

- 391 13. Talayero P, Mancebo E, Calvo-Pulido J, Rodriguez-Munoz S, Bernardo I, Laguna-Goya  
392 R, et al. Innate Lymphoid Cells Groups 1 and 3 in the Epithelial Compartment of Functional  
393 Human Intestinal Allografts. *Am J Transplant*. 2016;16(1):72-82. Epub 2015/09/01. doi:  
394 10.1111/ajt.13435. PubMed PMID: 26317573.
- 395 14. Van Acker A, Gronke K, Biswas A, Martens L, Saeys Y, Filtjens J, et al. A Murine  
396 Intestinal Intraepithelial NKp46-Negative Innate Lymphoid Cell Population Characterized by  
397 Group 1 Properties. *Cell Rep*. 2017;19(7):1431-43. doi: 10.1016/j.celrep.2017.04.068. PubMed  
398 PMID: 28514662.
- 399 15. Franzen A, Heinegard D. Isolation and characterization of two sialoproteins present only  
400 in bone calcified matrix. *Biochem J*. 1985;232(3):715-24. Epub 1985/12/15. PubMed PMID:  
401 4091817; PubMed Central PMCID: PMC1152943.
- 402 16. Prince CW, Oosawa T, Butler WT, Tomana M, Bhowan AS, Bhowan M, et al. Isolation,  
403 characterization, and biosynthesis of a phosphorylated glycoprotein from rat bone. *J Biol Chem*.  
404 1987;262(6):2900-7. Epub 1987/02/25. PubMed PMID: 3469201.
- 405 17. Ashkar S, Weber GF, Panoutsakopoulou V, Sanchirico ME, Jansson M, Zawaideh S, et  
406 al. Eta-1 (osteopontin): an early component of type-1 (cell-mediated) immunity. *Science*.  
407 2000;287(5454):860-4. Epub 2000/02/05. PubMed PMID: 10657301.
- 408 18. Hur EM, Youssef S, Haws ME, Zhang SY, Sobel RA, Steinman L. Osteopontin-induced  
409 relapse and progression of autoimmune brain disease through enhanced survival of activated T  
410 cells. *Nat Immunol*. 2007;8(1):74-83. Epub 2006/12/05. doi: 10.1038/ni1415. PubMed PMID:  
411 17143274.
- 412 19. Leavenworth JW, Verbinnen B, Wang Q, Shen E, Cantor H. Intracellular osteopontin  
413 regulates homeostasis and function of natural killer cells. *Proc Natl Acad Sci U S A*.

- 414 2015;112(2):494-9. Epub 2015/01/01. doi: 10.1073/pnas.1423011112. PubMed PMID:  
415 25550515; PubMed Central PMCID: PMC4299239.
- 416 20. Murugaiyan G, Mittal A, Weiner HL. Increased osteopontin expression in dendritic cells  
417 amplifies IL-17 production by CD4+ T cells in experimental autoimmune encephalomyelitis and  
418 in multiple sclerosis. *J Immunol.* 2008;181(11):7480-8. Epub 2008/11/20. PubMed PMID:  
419 19017937; PubMed Central PMCID: PMC2653058.
- 420 21. Staines KA, MacRae VE, Farquharson C. The importance of the SIBLING family of  
421 proteins on skeletal mineralisation and bone remodelling. *The Journal of endocrinology.*  
422 2012;214(3):241-55. Epub 2012/06/16. doi: 10.1530/JOE-12-0143. PubMed PMID: 22700194.
- 423 22. Ito K, Nakajima A, Fukushima Y, Suzuki K, Sakamoto K, Hamazaki Y, et al. The  
424 potential role of Osteopontin in the maintenance of commensal bacteria homeostasis in the  
425 intestine. *PLoS One.* 2017;12(3):e0173629. Epub 2017/03/16. doi:  
426 10.1371/journal.pone.0173629. PubMed PMID: 28296922; PubMed Central PMCID:  
427 PMC5351998.
- 428 23. Heilmann K, Hoffmann U, Witte E, Loddenkemper C, Sina C, Schreiber S, et al.  
429 Osteopontin as two-sided mediator of intestinal inflammation. *Journal of cellular and molecular*  
430 *medicine.* 2009;13(6):1162-74. Epub 2008/07/17. doi: 10.1111/j.1582-4934.2008.00428.x.  
431 PubMed PMID: 18627421; PubMed Central PMCID: PMC4496111.
- 432 24. Oz HS, Zhong J, de Villiers WJ. Osteopontin ablation attenuates progression of colitis in  
433 TNBS model. *Dig Dis Sci.* 2012;57(6):1554-61. Epub 2011/12/17. doi: 10.1007/s10620-011-  
434 2009-z. PubMed PMID: 22173746.
- 435 25. Mishima R, Takeshima F, Sawai T, Ohba K, Ohnita K, Isomoto H, et al. High plasma  
436 osteopontin levels in patients with inflammatory bowel disease. *J Clin Gastroenterol.*

- 437 2007;41(2):167-72. Epub 2007/01/25. doi: 10.1097/MCG.0b013e31802d6268. PubMed PMID:  
438 17245215.
- 439 26. Sato T, Nakai T, Tamura N, Okamoto S, Matsuoka K, Sakuraba A, et al.  
440 Osteopontin/Eta-1 upregulated in Crohn's disease regulates the Th1 immune response. *Gut*.  
441 2005;54(9):1254-62. Epub 2005/08/16. doi: 10.1136/gut.2004.048298. PubMed PMID:  
442 16099792; PubMed Central PMCID: PMC1774642.
- 443 27. Gassler N, Autschbach F, Gauer S, Bohn J, Sido B, Otto HF, et al. Expression of  
444 osteopontin (Eta-1) in Crohn disease of the terminal ileum. *Scand J Gastroenterol*.  
445 2002;37(11):1286-95. Epub 2002/12/06. PubMed PMID: 12465727.
- 446 28. Masuda H, Takahashi Y, Asai S, Takayama T. Distinct gene expression of osteopontin in  
447 patients with ulcerative colitis. *J Surg Res*. 2003;111(1):85-90. Epub 2003/07/05. PubMed  
448 PMID: 12842452.
- 449 29. Olivares-Villagomez D, Mendez-Fernandez YV, Parekh VV, Lalani S, Vincent TL,  
450 Cheroutre H, et al. Thymus leukemia antigen controls intraepithelial lymphocyte function and  
451 inflammatory bowel disease. *Proc Natl Acad Sci U S A*. 2008;105(46):17931-6. PMC2584730.  
452 PubMed PMID: 19004778.
- 453 30. Uhlig HH, McKenzie BS, Hue S, Thompson C, Joyce-Shaikh B, Stepankova R, et al.  
454 Differential activity of IL-12 and IL-23 in mucosal and systemic innate immune pathology.  
455 *Immunity*. 2006;25(2):309-18. Epub 2006/08/22. doi: 10.1016/j.immuni.2006.05.017. PubMed  
456 PMID: 16919486.
- 457 31. Giulietti A, Overbergh L, Valckx D, Decallonne B, Bouillon R, Mathieu C. An overview  
458 of real-time quantitative PCR: applications to quantify cytokine gene expression. *Methods*.

- 459 2001;25(4):386-401. Epub 2002/02/16. doi: 10.1006/meth.2001.1261. PubMed PMID:  
460 11846608.
- 461 32. Ellmeier W, Sawada S, Littman DR. The regulation of CD4 and CD8 coreceptor gene  
462 expression during T cell development. *Annu Rev Immunol.* 1999;17:523-54. Epub 1999/06/08.  
463 doi: 10.1146/annurev.immunol.17.1.523. PubMed PMID: 10358767.
- 464 33. Taniuchi I, Ellmeier W, Littman DR. The CD4/CD8 lineage choice: new insights into  
465 epigenetic regulation during T cell development. *Advances in immunology.* 2004;83:55-89.  
466 Epub 2004/05/12. doi: 10.1016/S0065-2776(04)83002-5. PubMed PMID: 15135628.
- 467 34. Masuda H, Takahashi Y, Asai S, Hemmi A, Takayama T. Osteopontin expression in  
468 ulcerative colitis is distinctly different from that in Crohn's disease and diverticulitis. *J*  
469 *Gastroenterol.* 2005;40(4):409-13. Epub 2005/05/04. doi: 10.1007/s00535-005-1567-2. PubMed  
470 PMID: 15868372.
- 471 35. Zhong J, Eckhardt ER, Oz HS, Bruemmer D, de Villiers WJ. Osteopontin deficiency  
472 protects mice from Dextran sodium sulfate-induced colitis. *Inflamm Bowel Dis.* 2006;12(8):790-  
473 6. Epub 2006/08/19. PubMed PMID: 16917234.
- 474 36. Toyonaga T, Nakase H, Ueno S, Matsuura M, Yoshino T, Honzawa Y, et al. Osteopontin  
475 Deficiency Accelerates Spontaneous Colitis in Mice with Disrupted Gut Microbiota and  
476 Macrophage Phagocytic Activity. *PLoS One.* 2015;10(8):e0135552. Epub 2015/08/15. doi:  
477 10.1371/journal.pone.0135552. PubMed PMID: 26274807; PubMed Central PMCID:  
478 PMC4537118.
- 479 37. Kourepini E, Aggelakopoulou M, Alissafi T, Paschalidis N, Simoes DC,  
480 Panoutsakopoulou V. Osteopontin expression by CD103- dendritic cells drives intestinal

481 inflammation. Proc Natl Acad Sci U S A. 2014;111(9):E856-65. Epub 2014/02/20. doi:  
482 10.1073/pnas.1316447111. PubMed PMID: 24550510; PubMed Central PMCID: PMC3948306.  
483 38. Kanayama M, Xu S, Danzaki K, Gibson JR, Inoue M, Gregory SG, et al. Skewing of the  
484 population balance of lymphoid and myeloid cells by secreted and intracellular osteopontin. Nat  
485 Immunol. 2017;18(9):973-84. Epub 2017/07/04. doi: 10.1038/ni.3791. PubMed PMID:  
486 28671690; PubMed Central PMCID: PMCPMC5568448.  
487 39. Kumar AA, Delgado AG, Piazeulo MB, Van Kaer L, Olivares-Villagomez D. Innate  
488 CD8alpha+ lymphocytes enhance anti-CD40 antibody-mediated colitis in mice. Immun  
489 Inflamm Dis. 2017;5(2):109-23. doi: 10.1002/iid3.146. PubMed PMID: 28474503; PubMed  
490 Central PMCID: PMCPMC5418141.  
491 40. Leishman AJ, Naidenko OV, Attinger A, Koning F, Lena CJ, Xiong Y, et al. T cell  
492 responses modulated through interaction between CD8alpha and the nonclassical MHC  
493 class I molecule, TL. Science. 2001;294(5548):1936-9. PubMed PMID: 11729321.  
494 41. Teitell M, Mescher MF, Olson CA, Littman DR, Kronenberg M. The thymus leukemia  
495 antigen binds human and mouse CD8. J Exp Med. 1991;174(5):1131-8. PubMed PMID:  
496 1834760.  
497 42. Weber GF, Ashkar S, Glimcher MJ, Cantor H. Receptor-ligand interaction between  
498 CD44 and osteopontin (Eta-1). Science. 1996;271(5248):509-12. Epub 1996/01/26. PubMed  
499 PMID: 8560266.  
500 43. Bhagat G, Naiyer AJ, Shah JG, Harper J, Jabri B, Wang TC, et al. Small intestinal  
501 CD8+TCRgammadelta+NKG2A+ intraepithelial lymphocytes have attributes of regulatory cells  
502 in patients with celiac disease. J Clin Invest. 2008;118(1):281-93. Epub 2007/12/08. doi:  
503 10.1172/JCI30989. PubMed PMID: 18064301; PubMed Central PMCID: PMCPMC2117760.

504 Figure legends

505 Fig. 1. *iCD8 $\alpha$  cell deficiency results in decreased NKp46<sup>+</sup>NK1.1<sup>+</sup> IEL numbers.* Total IEL from  
506 Rag-2<sup>-/-</sup> and E81<sup>-/-</sup>Rag-2<sup>-/-</sup> mice were analyzed for the presence of CD45<sup>+</sup> and CD45<sup>+</sup>CD8 $\alpha$ <sup>-</sup>  
507 NKp46<sup>+</sup>NK1.1<sup>+</sup> IEL. (a) Gating strategy for the analysis of the IEL compartment used  
508 throughout this report. Dead cells were excluded using a viability dye. (b) Total IEL numbers of  
509 the indicated subpopulations. Each symbol represents an individual mouse (n=7 to 8). Data are  
510 representative of at least two independent experiments. \* $p$ <0.05, \*\*\* $p$ <0.001 using unpaired  
511 two-tailed Student's T test.

512  
513 Fig. 2. *Osteopontin expression in the IEL compartment is primarily associated with iCD8 $\alpha$  cells.*  
514 (a) Osteopontin mRNA expression in colon of the indicated mice. Expression levels in E81<sup>-/-</sup>Rag-  
515 2<sup>-/-</sup> mice were compared to the average expression levels observed in Rag-2<sup>-/-</sup> mice. Each symbol  
516 represents an individual mouse (n=7 to 8). Data are the combination of two independent  
517 experiments. (b) Osteopontin expression in naïve Rag-2<sup>-/-</sup>Spp-1-EGFP-KI mice. Histogram is a  
518 representative mouse (n=4). Data are representative of at least two independent experiments.  
519 \*\* $p$ <0.01, using unpaired two-tailed Student's T test for (a) and non-parametric one-way  
520 ANOVA for (b).

521  
522 Fig. 3. *iCD8 $\alpha$  cells and osteopontin promote survival of NKp46<sup>+</sup>NK1.1<sup>+</sup> IEL.* Enriched CD45<sup>+</sup>  
523 IEL from Rag-2<sup>-/-</sup> (a) or E81<sup>-/-</sup>Rag-2<sup>-/-</sup> (b) mice were incubated in the presence or absence of  
524 recombinant osteopontin (2 $\mu$ g/ml final concentration). Cells were recovered 4 hours later and  
525 analyzed for annexin V staining on NKp46<sup>+</sup>NK1.1<sup>+</sup> IEL as indicated in the Materials and  
526 methods section. Data are representative of at least two independent experiments (n=4). (c)



527 Enriched CD45<sup>+</sup> cells from Spp-1<sup>-/-</sup>Rag-2<sup>-/-</sup> mice were incubated in the presence or absence of  
528 iCD8 $\alpha$  cells derived from Rag-2<sup>-/-</sup> mice. Cells were recovered 4 hours later and analyzed for  
529 annexin V staining on NKp46<sup>+</sup>NK1.1<sup>+</sup> IEL as indicated in the Materials and Method section. In  
530 order to obtain enough iCD8 $\alpha$  cells, 2-3 mice were pooled and counted as one sample (n=4).  
531 Data is representative of at least 2 experiments. \* $p$ <0.05, using unpaired two-tailed Student's T  
532 test.

533  
534 Fig. 4. *Osteopontin kinetics during intestinal inflammation.* (a) Osteopontin protein  
535 concentration in the supernatants of whole colon tissue cultures from naïve and anti-CD40-  
536 treated Rag-2<sup>-/-</sup> mice. Data is representative of at least 2 experiments (n=5). (b) Osteopontin  
537 protein concentration in the supernatants of iCD8 $\alpha$  cells derived from naïve and anti-CD40-  
538 treated Rag-2<sup>-/-</sup> mice. Data is representative of at least two experiments. In order to obtain  
539 enough iCD8 $\alpha$  cells, 2-3 mice were pooled and counted as one sample (n=3). (c) GFP expression  
540 in Rag-2<sup>-/-</sup>Spp-1-EGFP-KI mice treated with anti-CD40 and analyzed at the indicated time  
541 points. Cells were gated as indicated in Fig.1a. Histograms are from a representative sample. Bar  
542 graph shows data summary. \* $p$ <0.05, \*\*\* $p$ <0.001 using unpaired two-tailed Student's T test.

543  
544 Fig. 5. *Osteopontin promotes intestinal inflammation.* (a) Rag-2<sup>-/-</sup> and Spp-1<sup>-/-</sup>Rag-2<sup>-/-</sup> mice were  
545 treated with 150  $\mu$ g of anti-CD40 and monitored daily for weight change for 7 days. (b)  
546 Pathological representation (micrographs, magnification 200X) and disease score; each symbol  
547 represents an individual mouse (n=5 to 6). Data is representative of at least 2 experiments. (c) IL-  
548 23p19 mRNA expression from total colons; each symbol represents an individual mouse (n=5 to  
549 6). Data is representative of at least 2 experiments. (d) Total iCD8 $\alpha$  cell and NKp46<sup>+</sup>NK1.1<sup>+</sup> IEL

550 numbers in naïve Rag-2<sup>-/-</sup> and Spp-1<sup>-/-</sup>Rag-2<sup>-/-</sup> mice; each symbol represents and individual  
551 mouse (n=9 to 10). Data is representative of 3 experiments. \**p*<0.05, \*\**p*<0.01 using two-way  
552 ANOVA (a) or unpaired two-tailed Student's T test (b, c, d).

553

554 Fig. 6. *Decreased intestinal inflammation in mice deficient in iCD8α cells.* Rag-2<sup>-/-</sup> and E81<sup>-/-</sup>  
555 Rag-2<sup>-/-</sup> mice were treated with anti-CD40 and monitored for 7 days for weight change (a). (b) At  
556 the endpoint, colons were harvested for pathological analysis. (c) Osteopontin mRNA expression  
557 from the colons of anti-CD40 treated Rag-2<sup>-/-</sup> and E81<sup>-/-</sup>Rag-2<sup>-/-</sup> mice at the indicated time points.  
558 Data is representative of at least two independent experiments (n=6 to 8). (d) E81<sup>-/-</sup>Rag-2<sup>-/-</sup> mice  
559 were treated with recombinant osteopontin or PBS at day -2, -1 and 1 before and after disease  
560 induction with 70μg of anti-CD40 antibodies, and their weights monitored for 7 days. (e) At the  
561 endpoint, colons were harvested for pathological analysis. Data is representative of at least 3  
562 independent experiments (n=6 to 7). Each symbol represents and individual mouse. \**p*<0.05,  
563 \*\**p*<0.01, \*\*\**p*<0.01 using two-way ANOVA (a, d), unpaired two-tailed Student's T test (b, c)  
564 or one-way ANOVA (e).

565

566

a

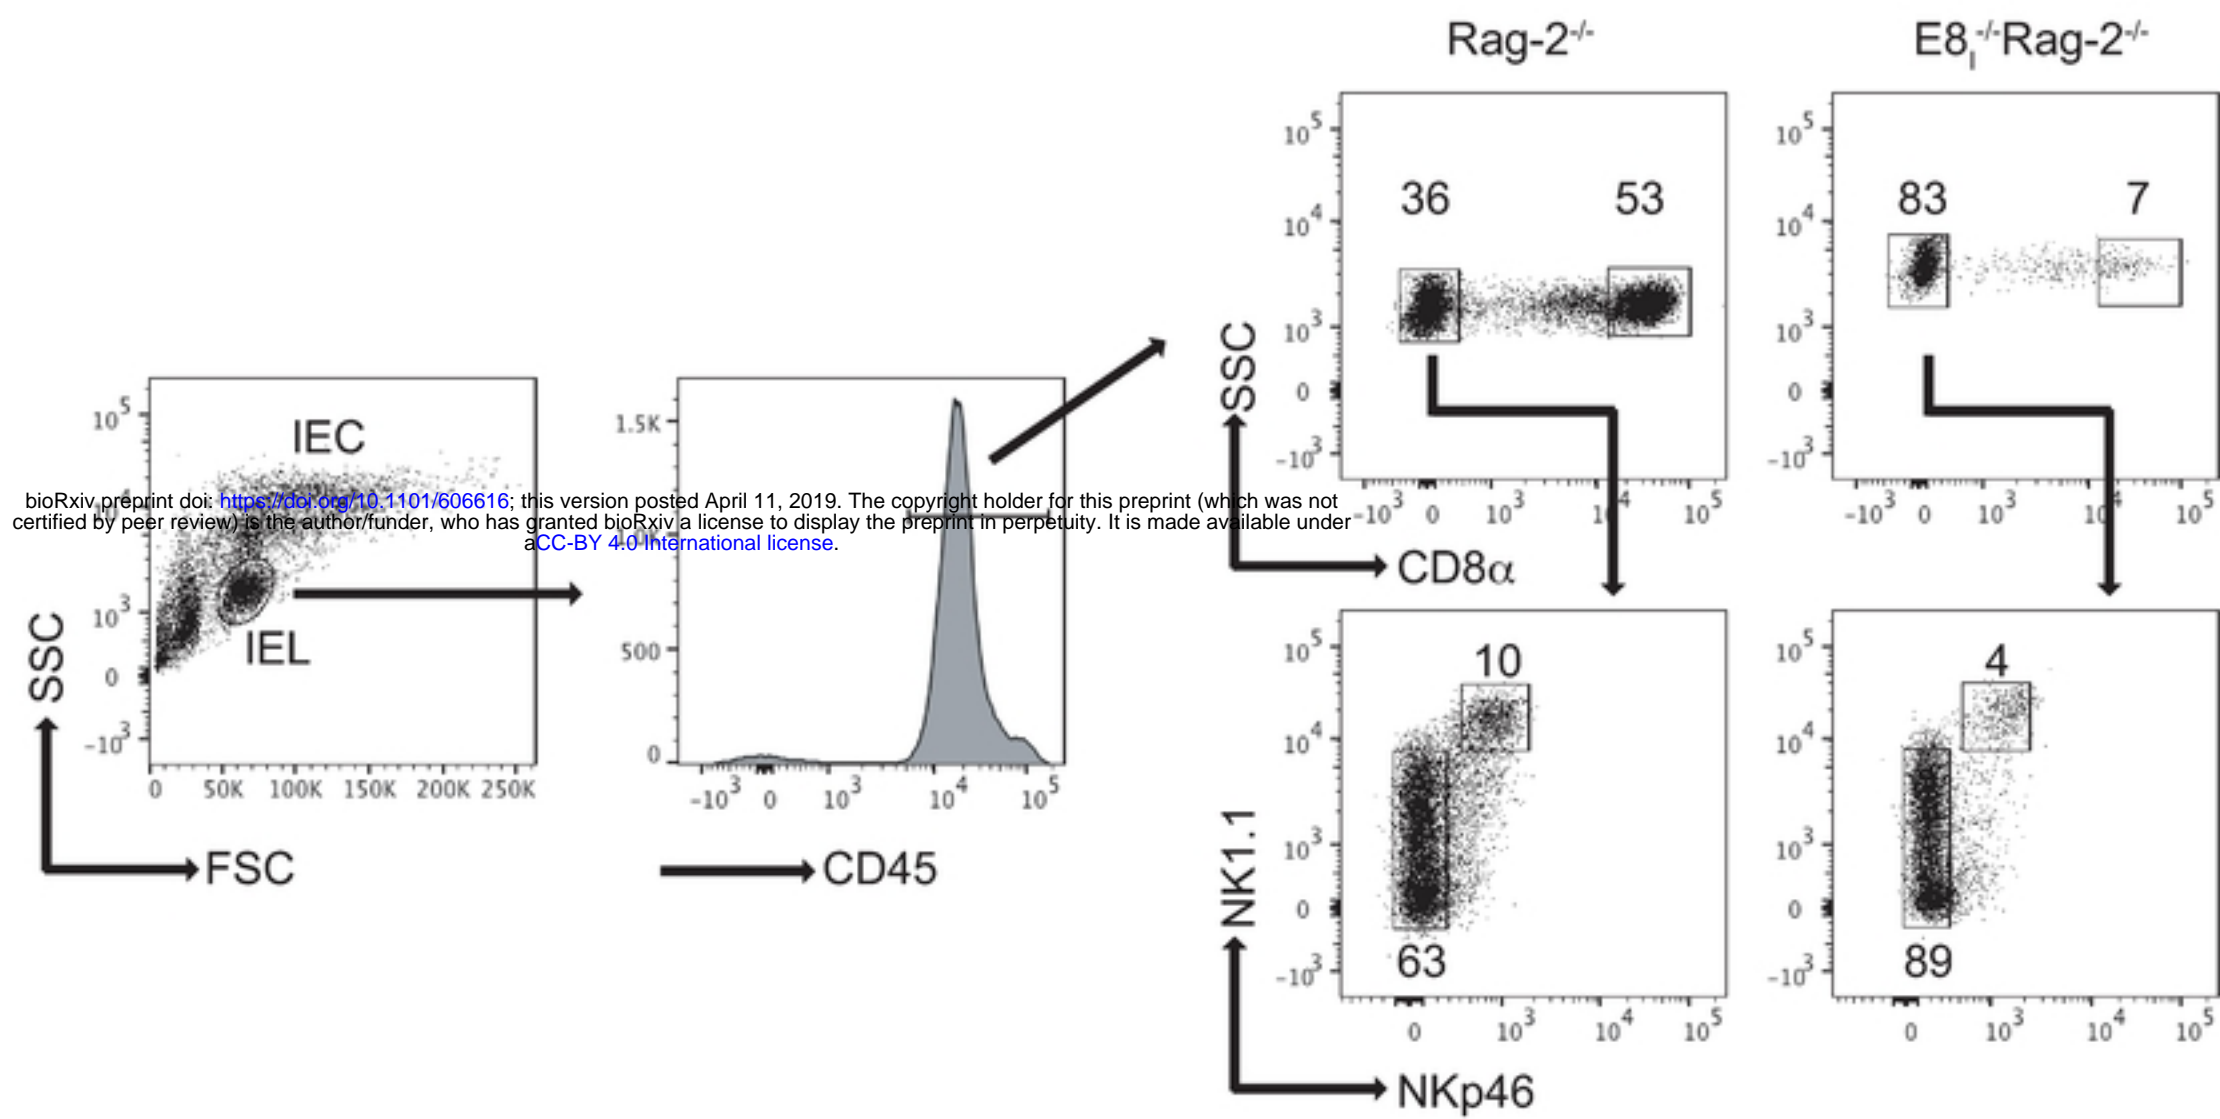

b

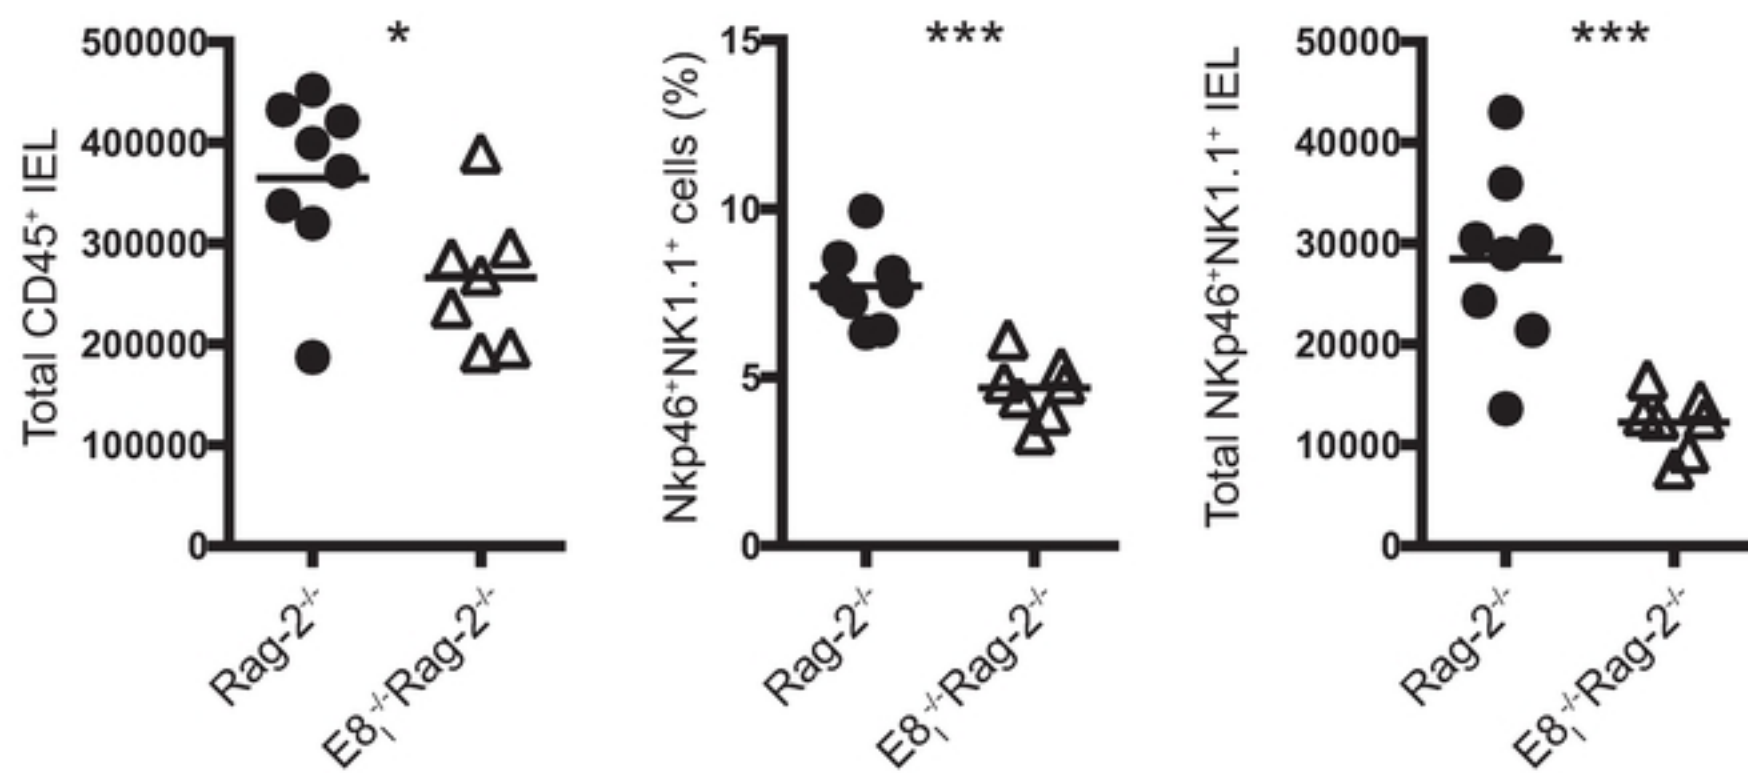

Figure 1

Figure 1

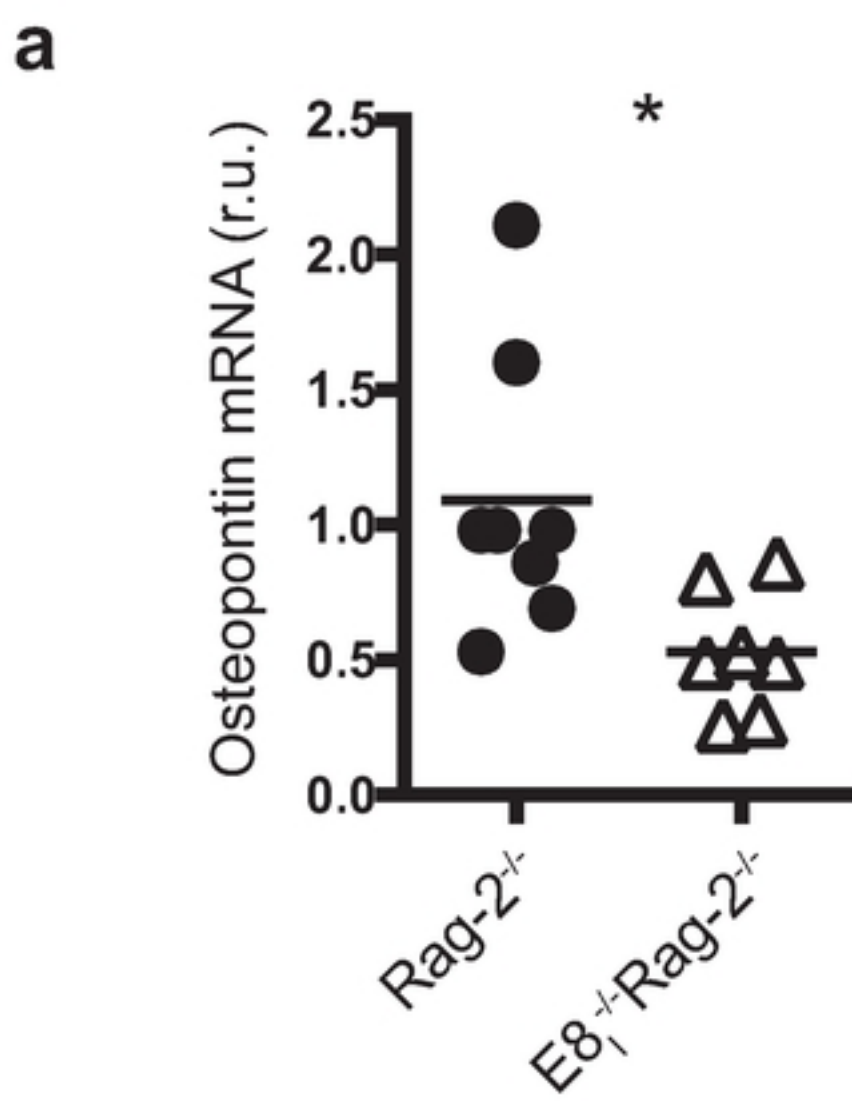

**b**

bioRxiv preprint doi: <https://doi.org/10.1101/606616>; this version posted April 11, 2019. The copyright holder for this preprint (which was not certified by peer review) is the author/funder, who has granted bioRxiv a license to display the preprint in perpetuity. It is made available under aCC-BY 4.0 International license.

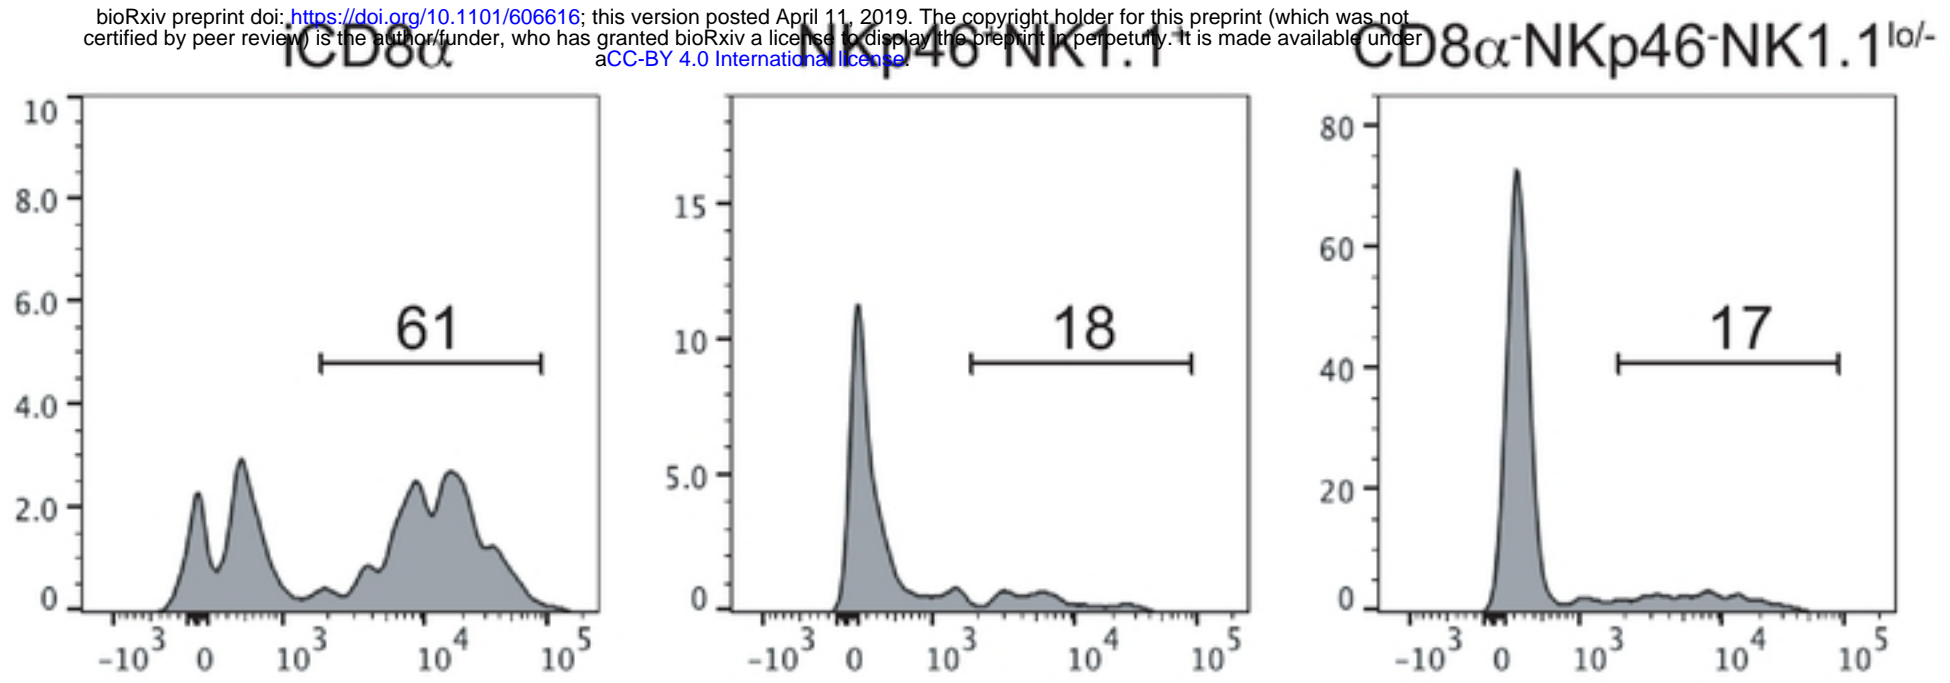

→ GFP

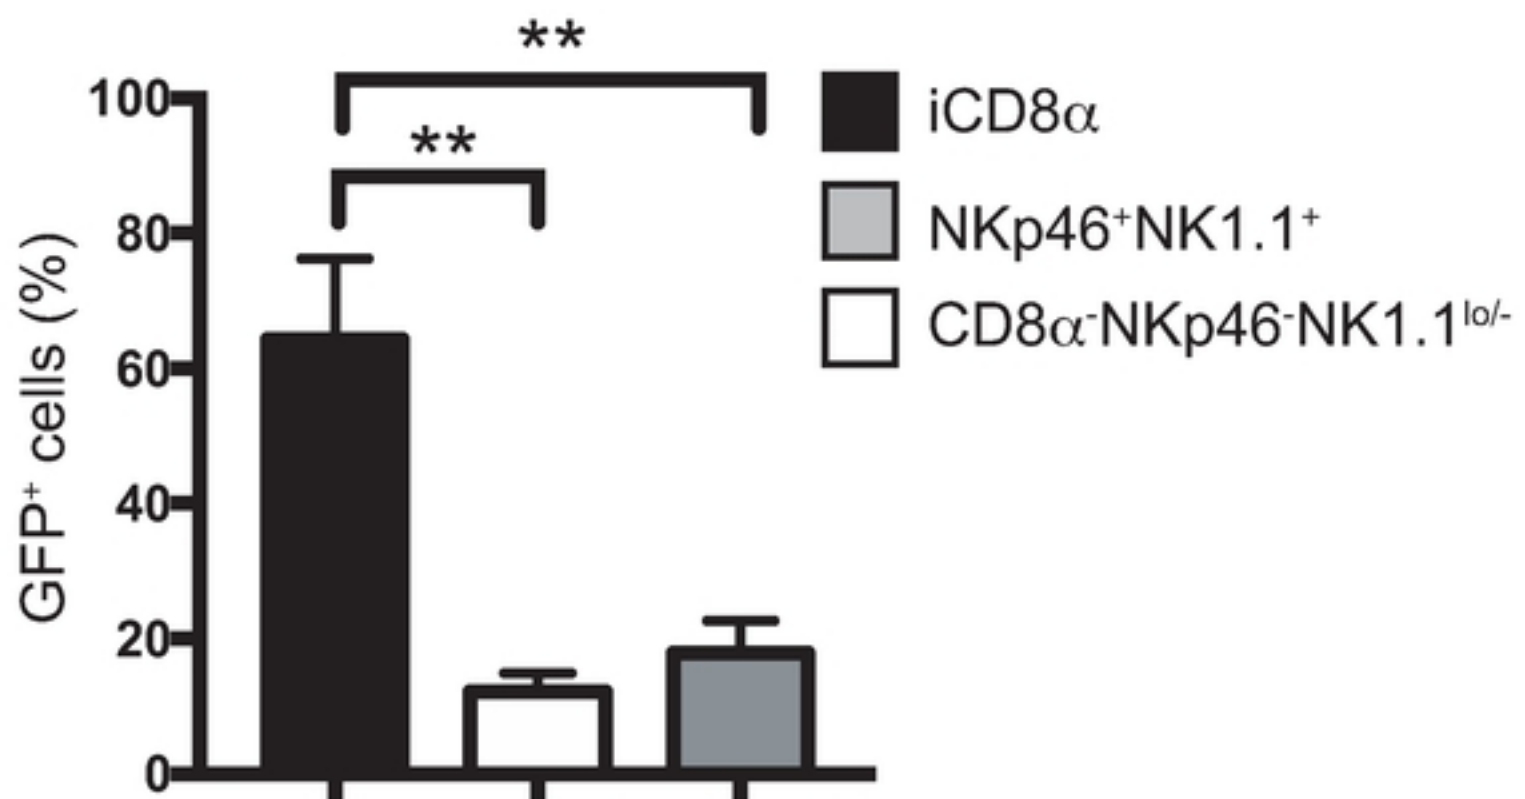

Figure 2

Figure 2

a

Rag-2<sup>-/-</sup> CD45<sup>+</sup> IEL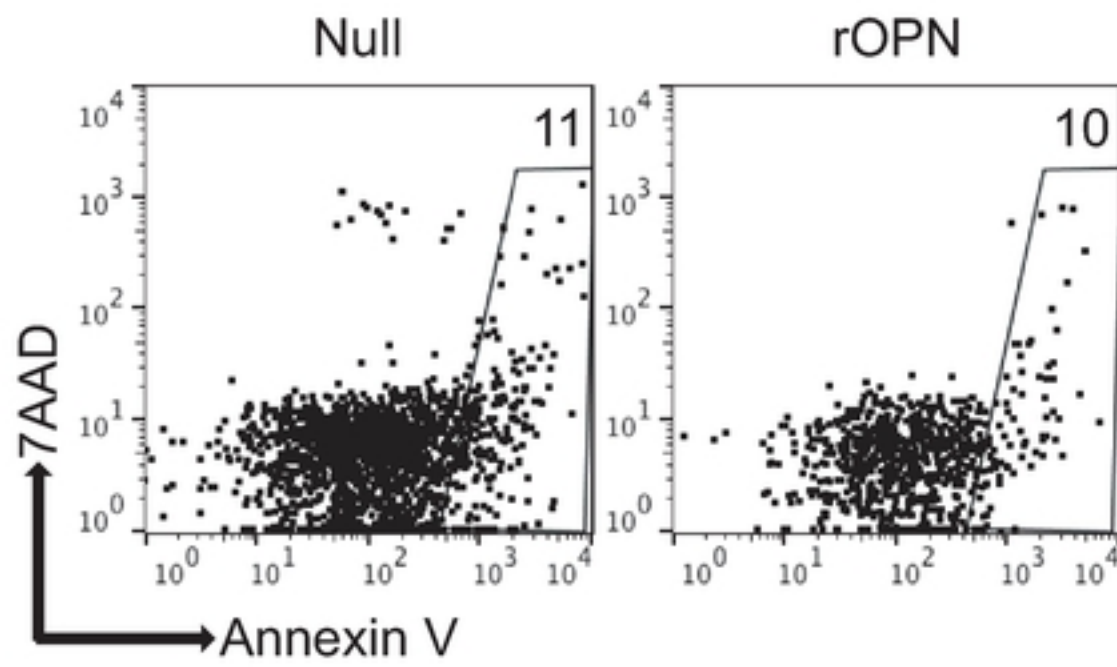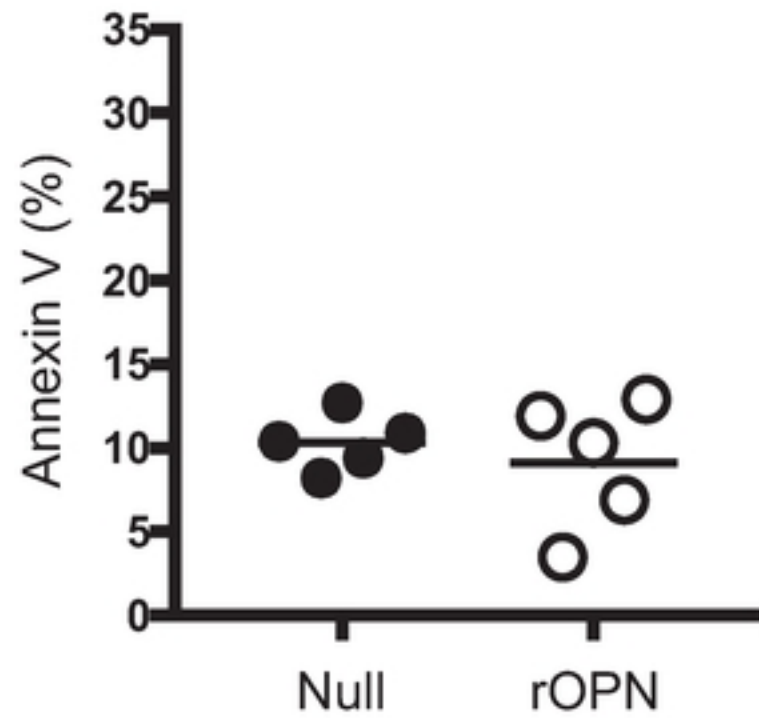

b

bioRxiv preprint doi: <https://doi.org/10.1101/606616>; this version posted April 11, 2019. The copyright holder for this preprint (which was not certified by peer review) is the author/funder, who has granted bioRxiv a license to display the preprint in perpetuity. It is made available under aCC-BY 4.0 International license.

E8<sub>1</sub><sup>-/-</sup> Rag-2<sup>-/-</sup> CD45<sup>+</sup> IEL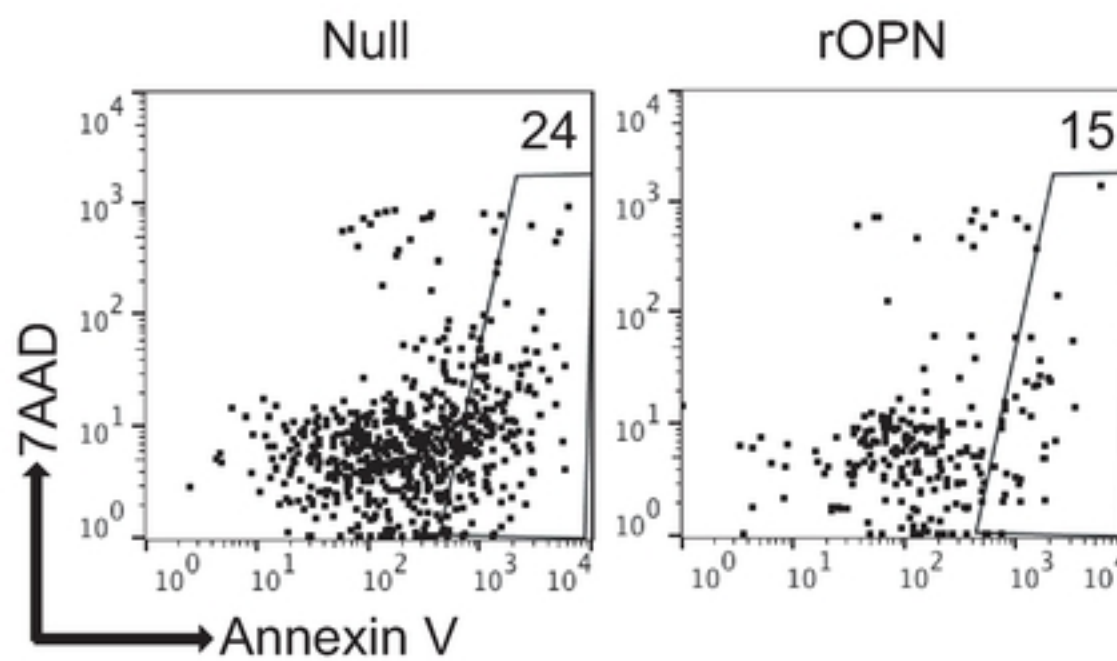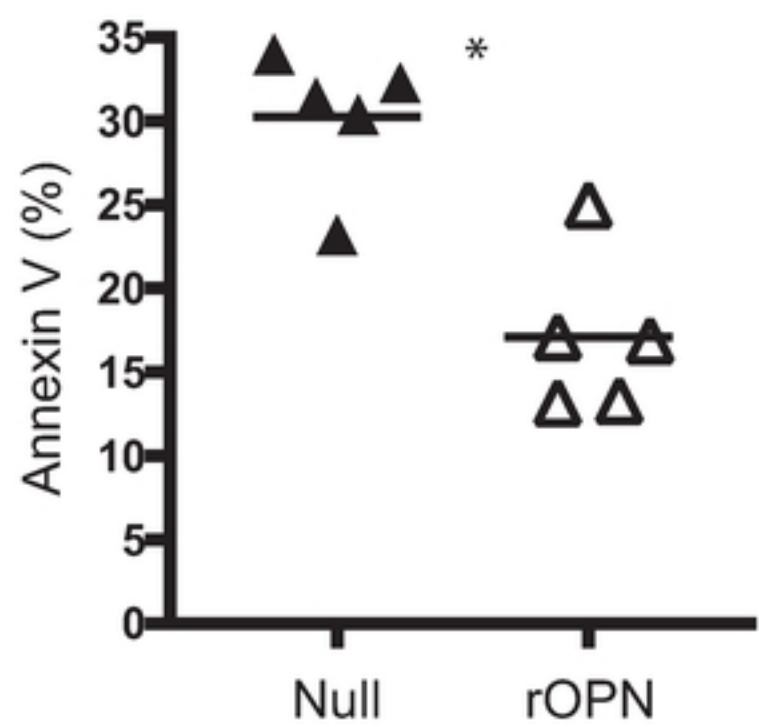

c

Spp-1<sup>-/-</sup> Rag-2<sup>-/-</sup> CD45<sup>+</sup> IEL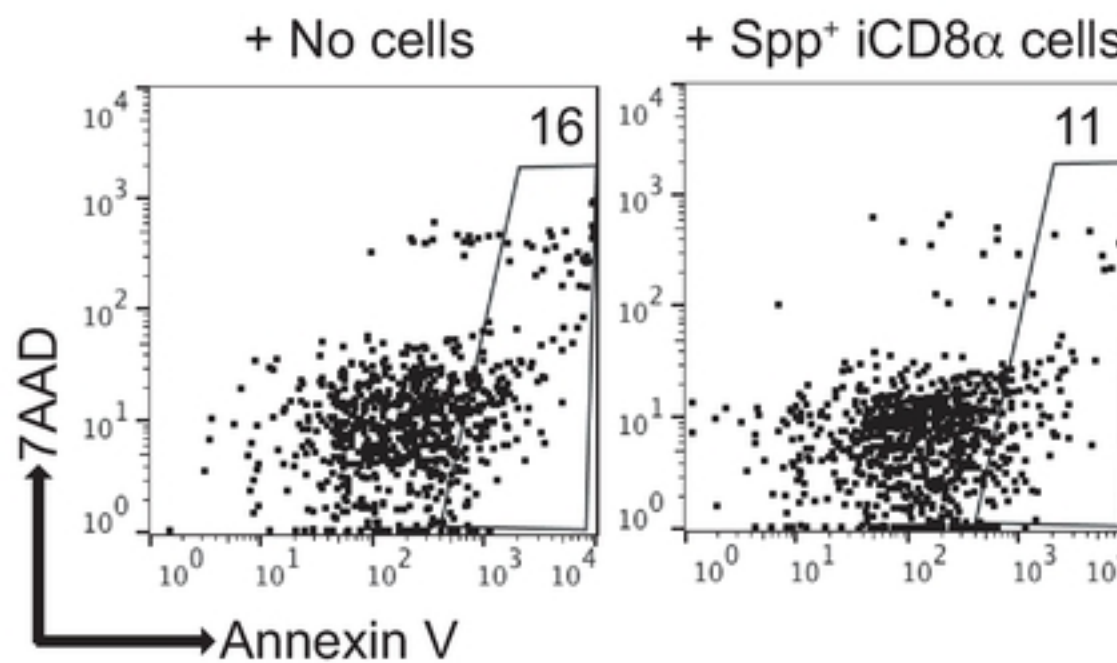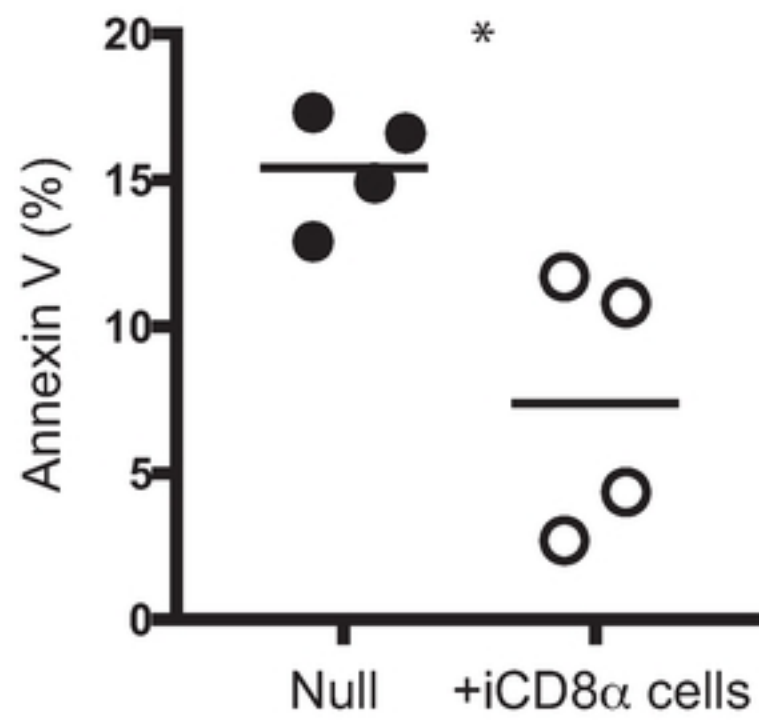

Figure 3

Figure 3



bioRxiv preprint doi: <https://doi.org/10.1101/606616>; this version posted April 11, 2019. The copyright holder for this preprint (which was not certified by peer review) is the author/funder, who has granted bioRxiv a license to display the preprint in perpetuity. It is made available under aCC-BY 4.0 International license.

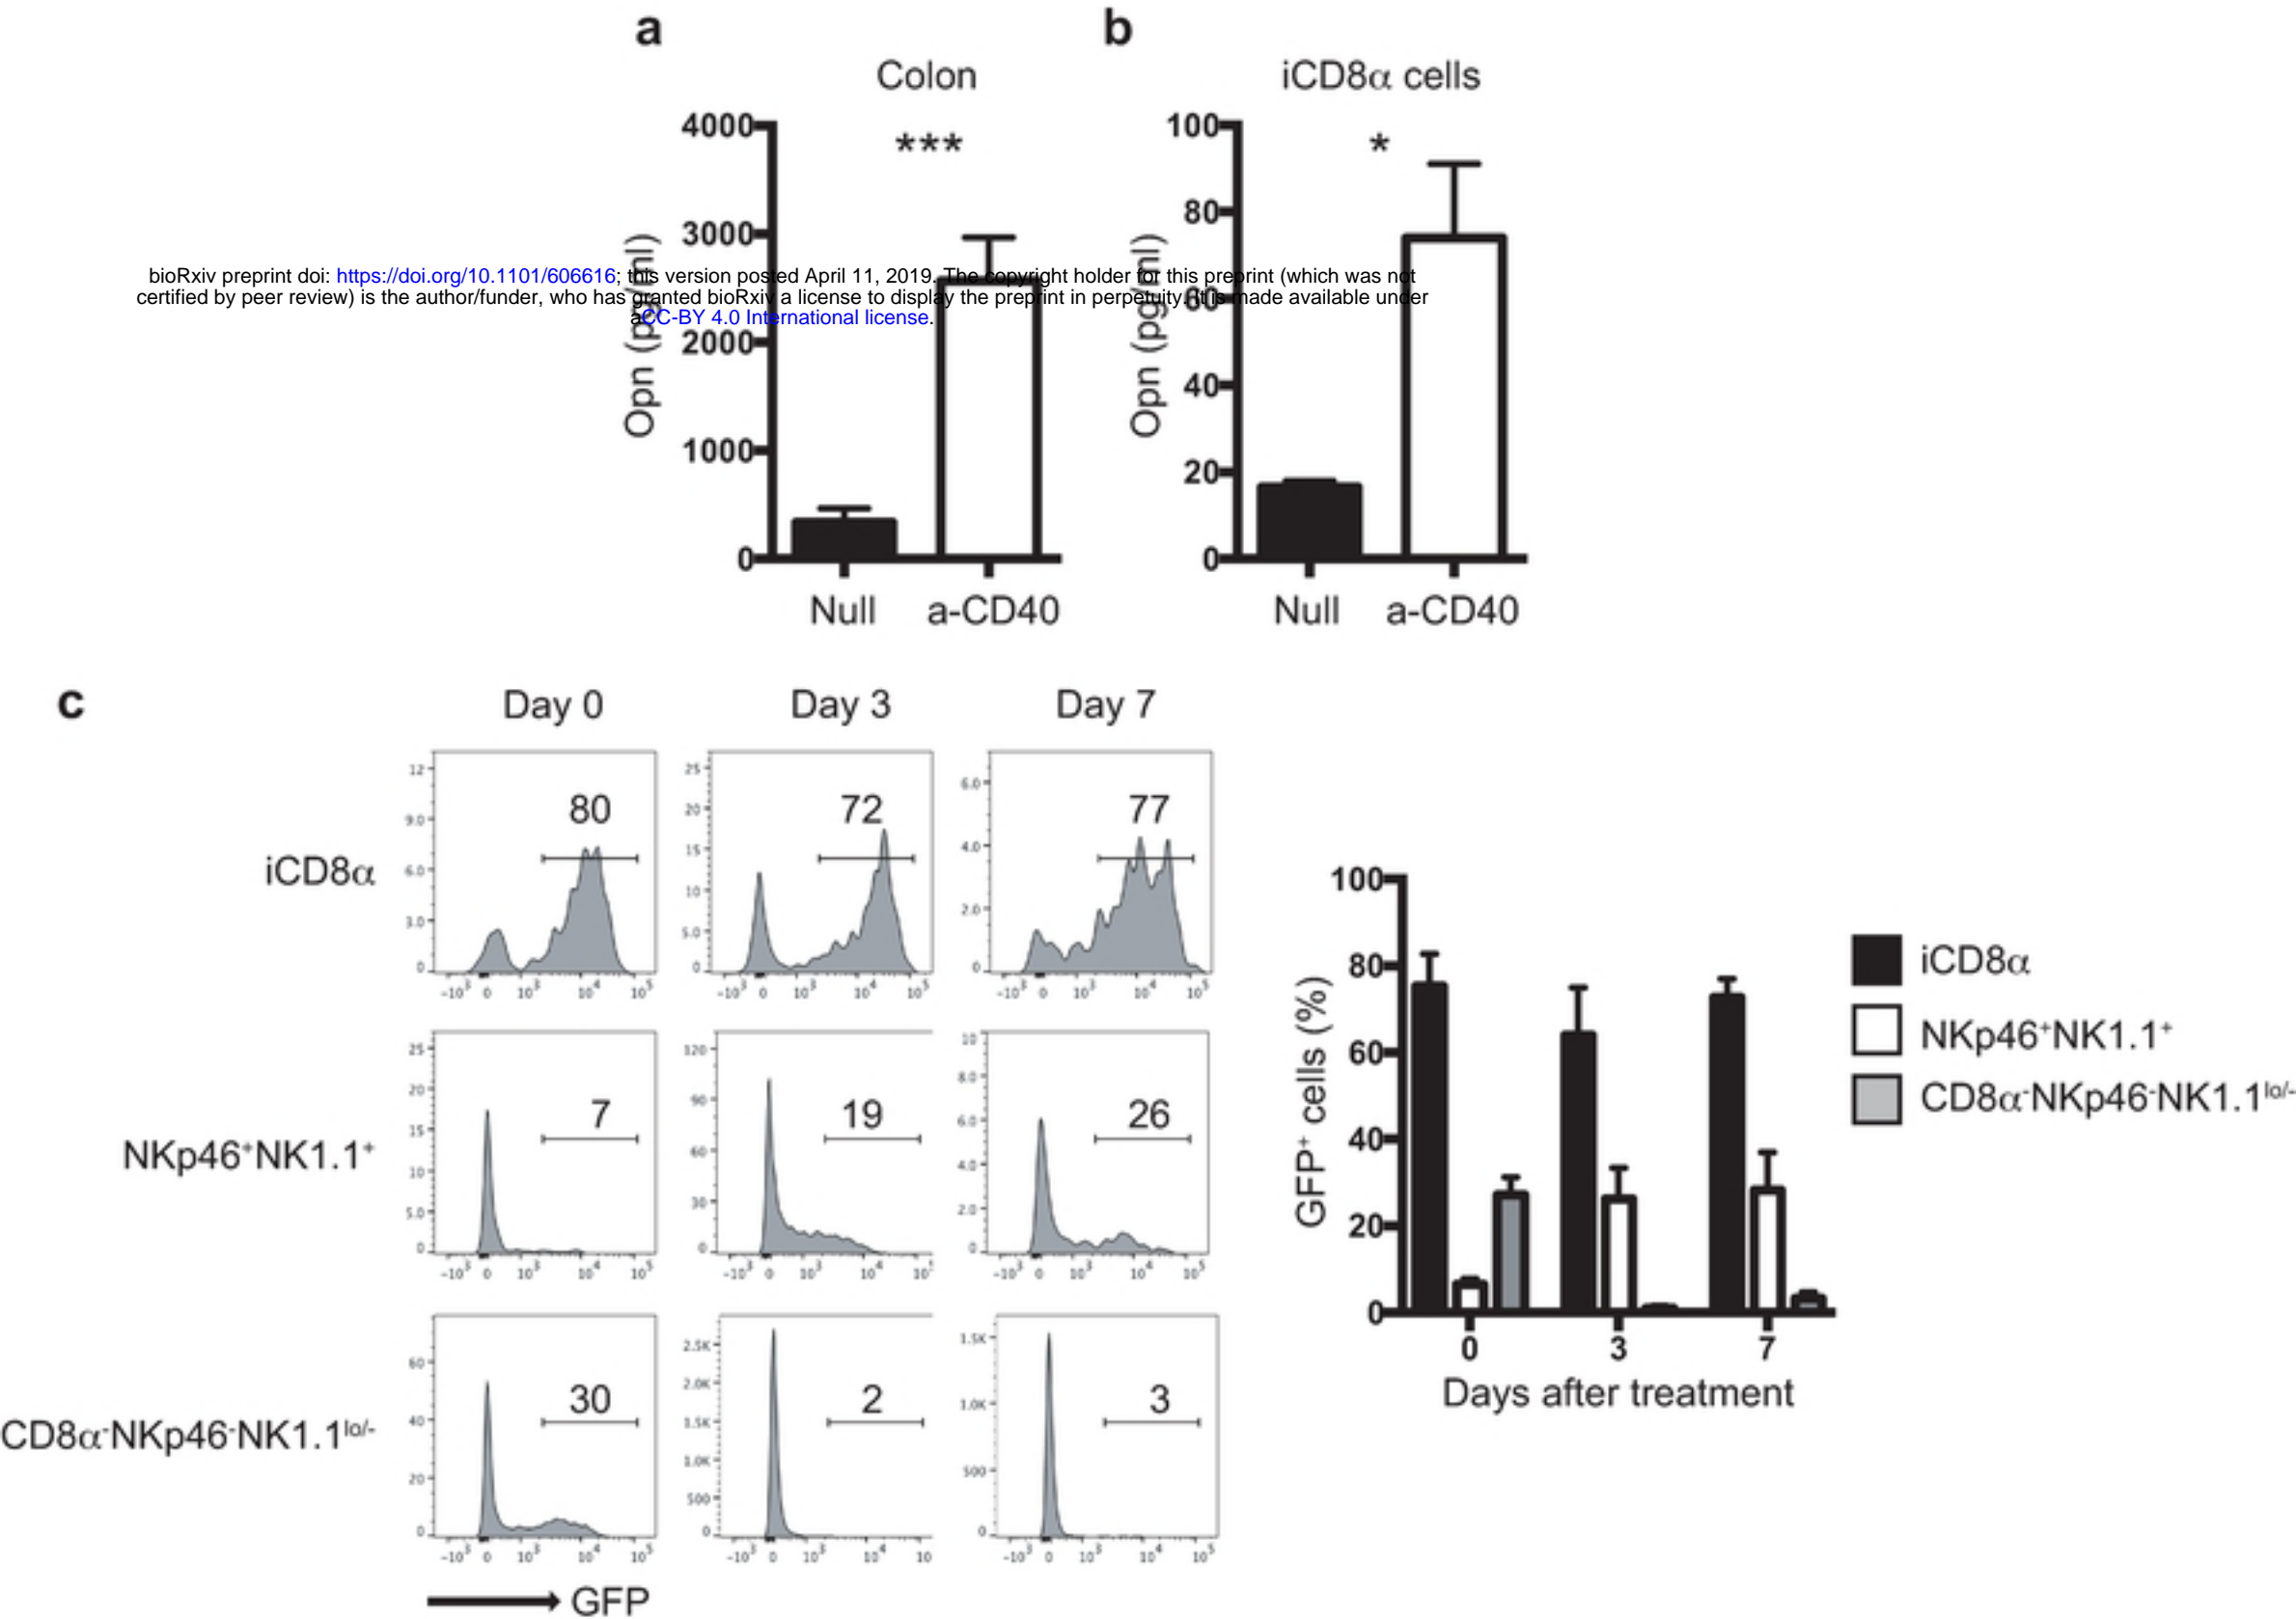

Figure 4

Figure 4

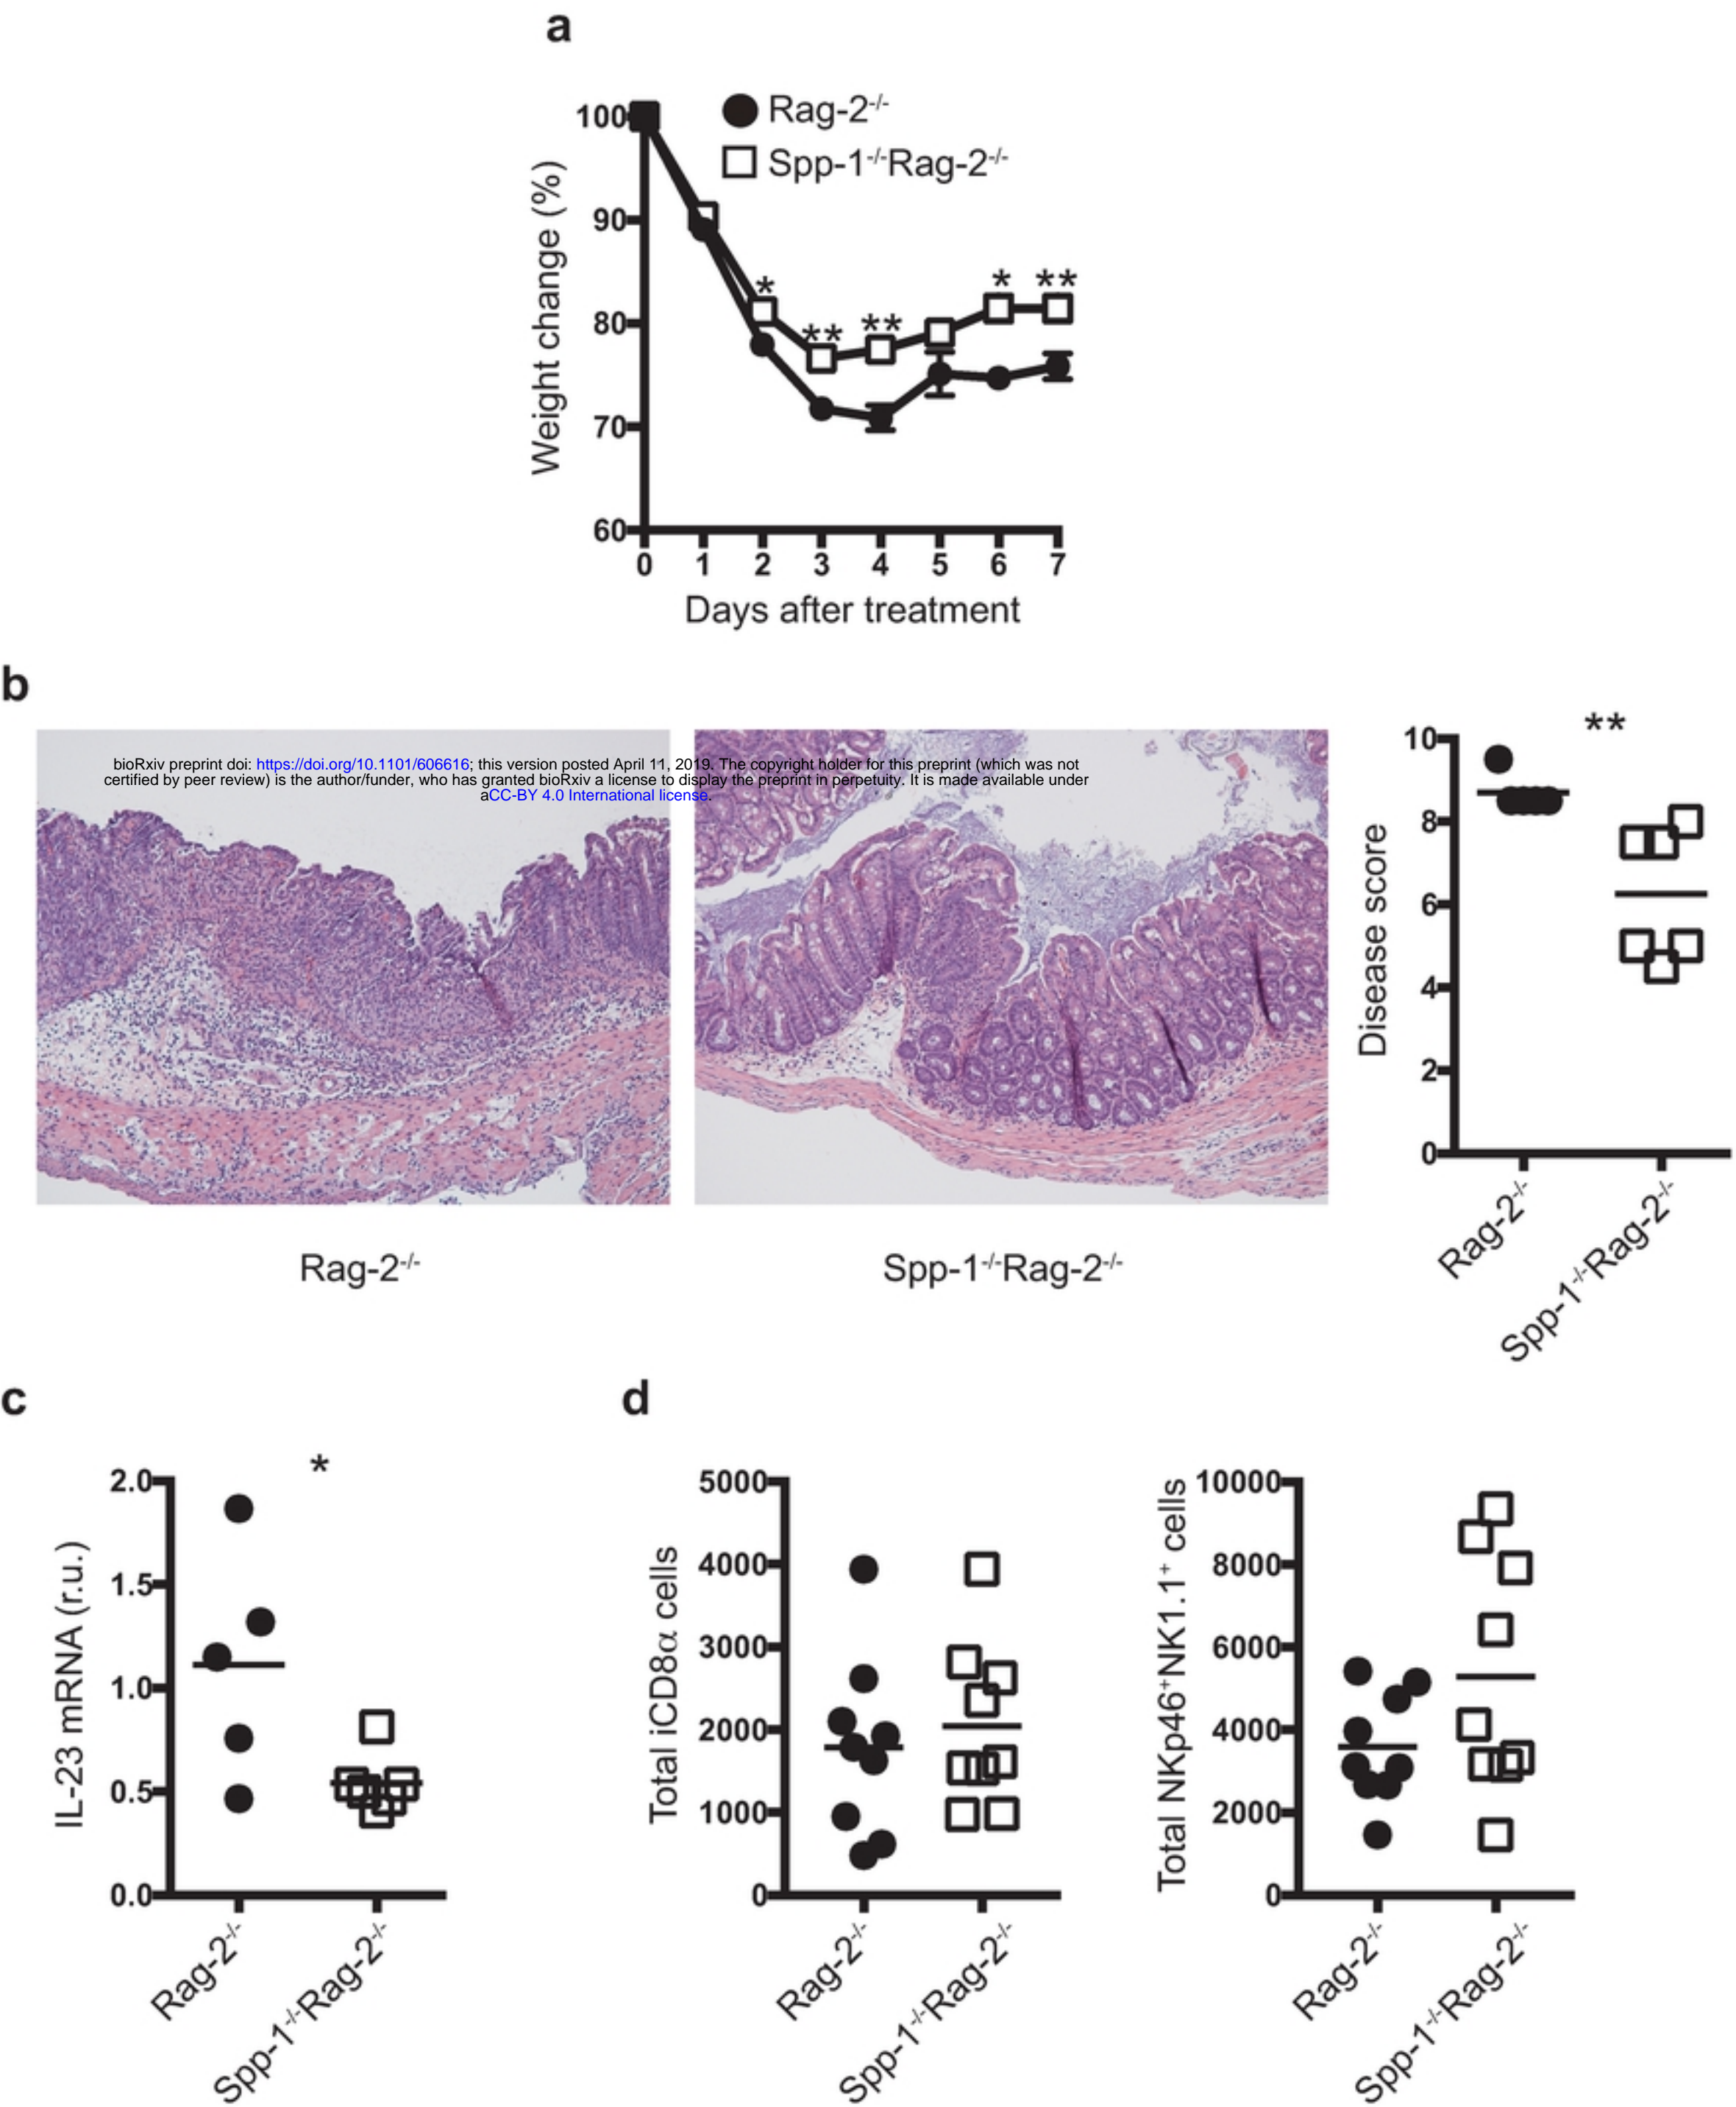

Figure 5

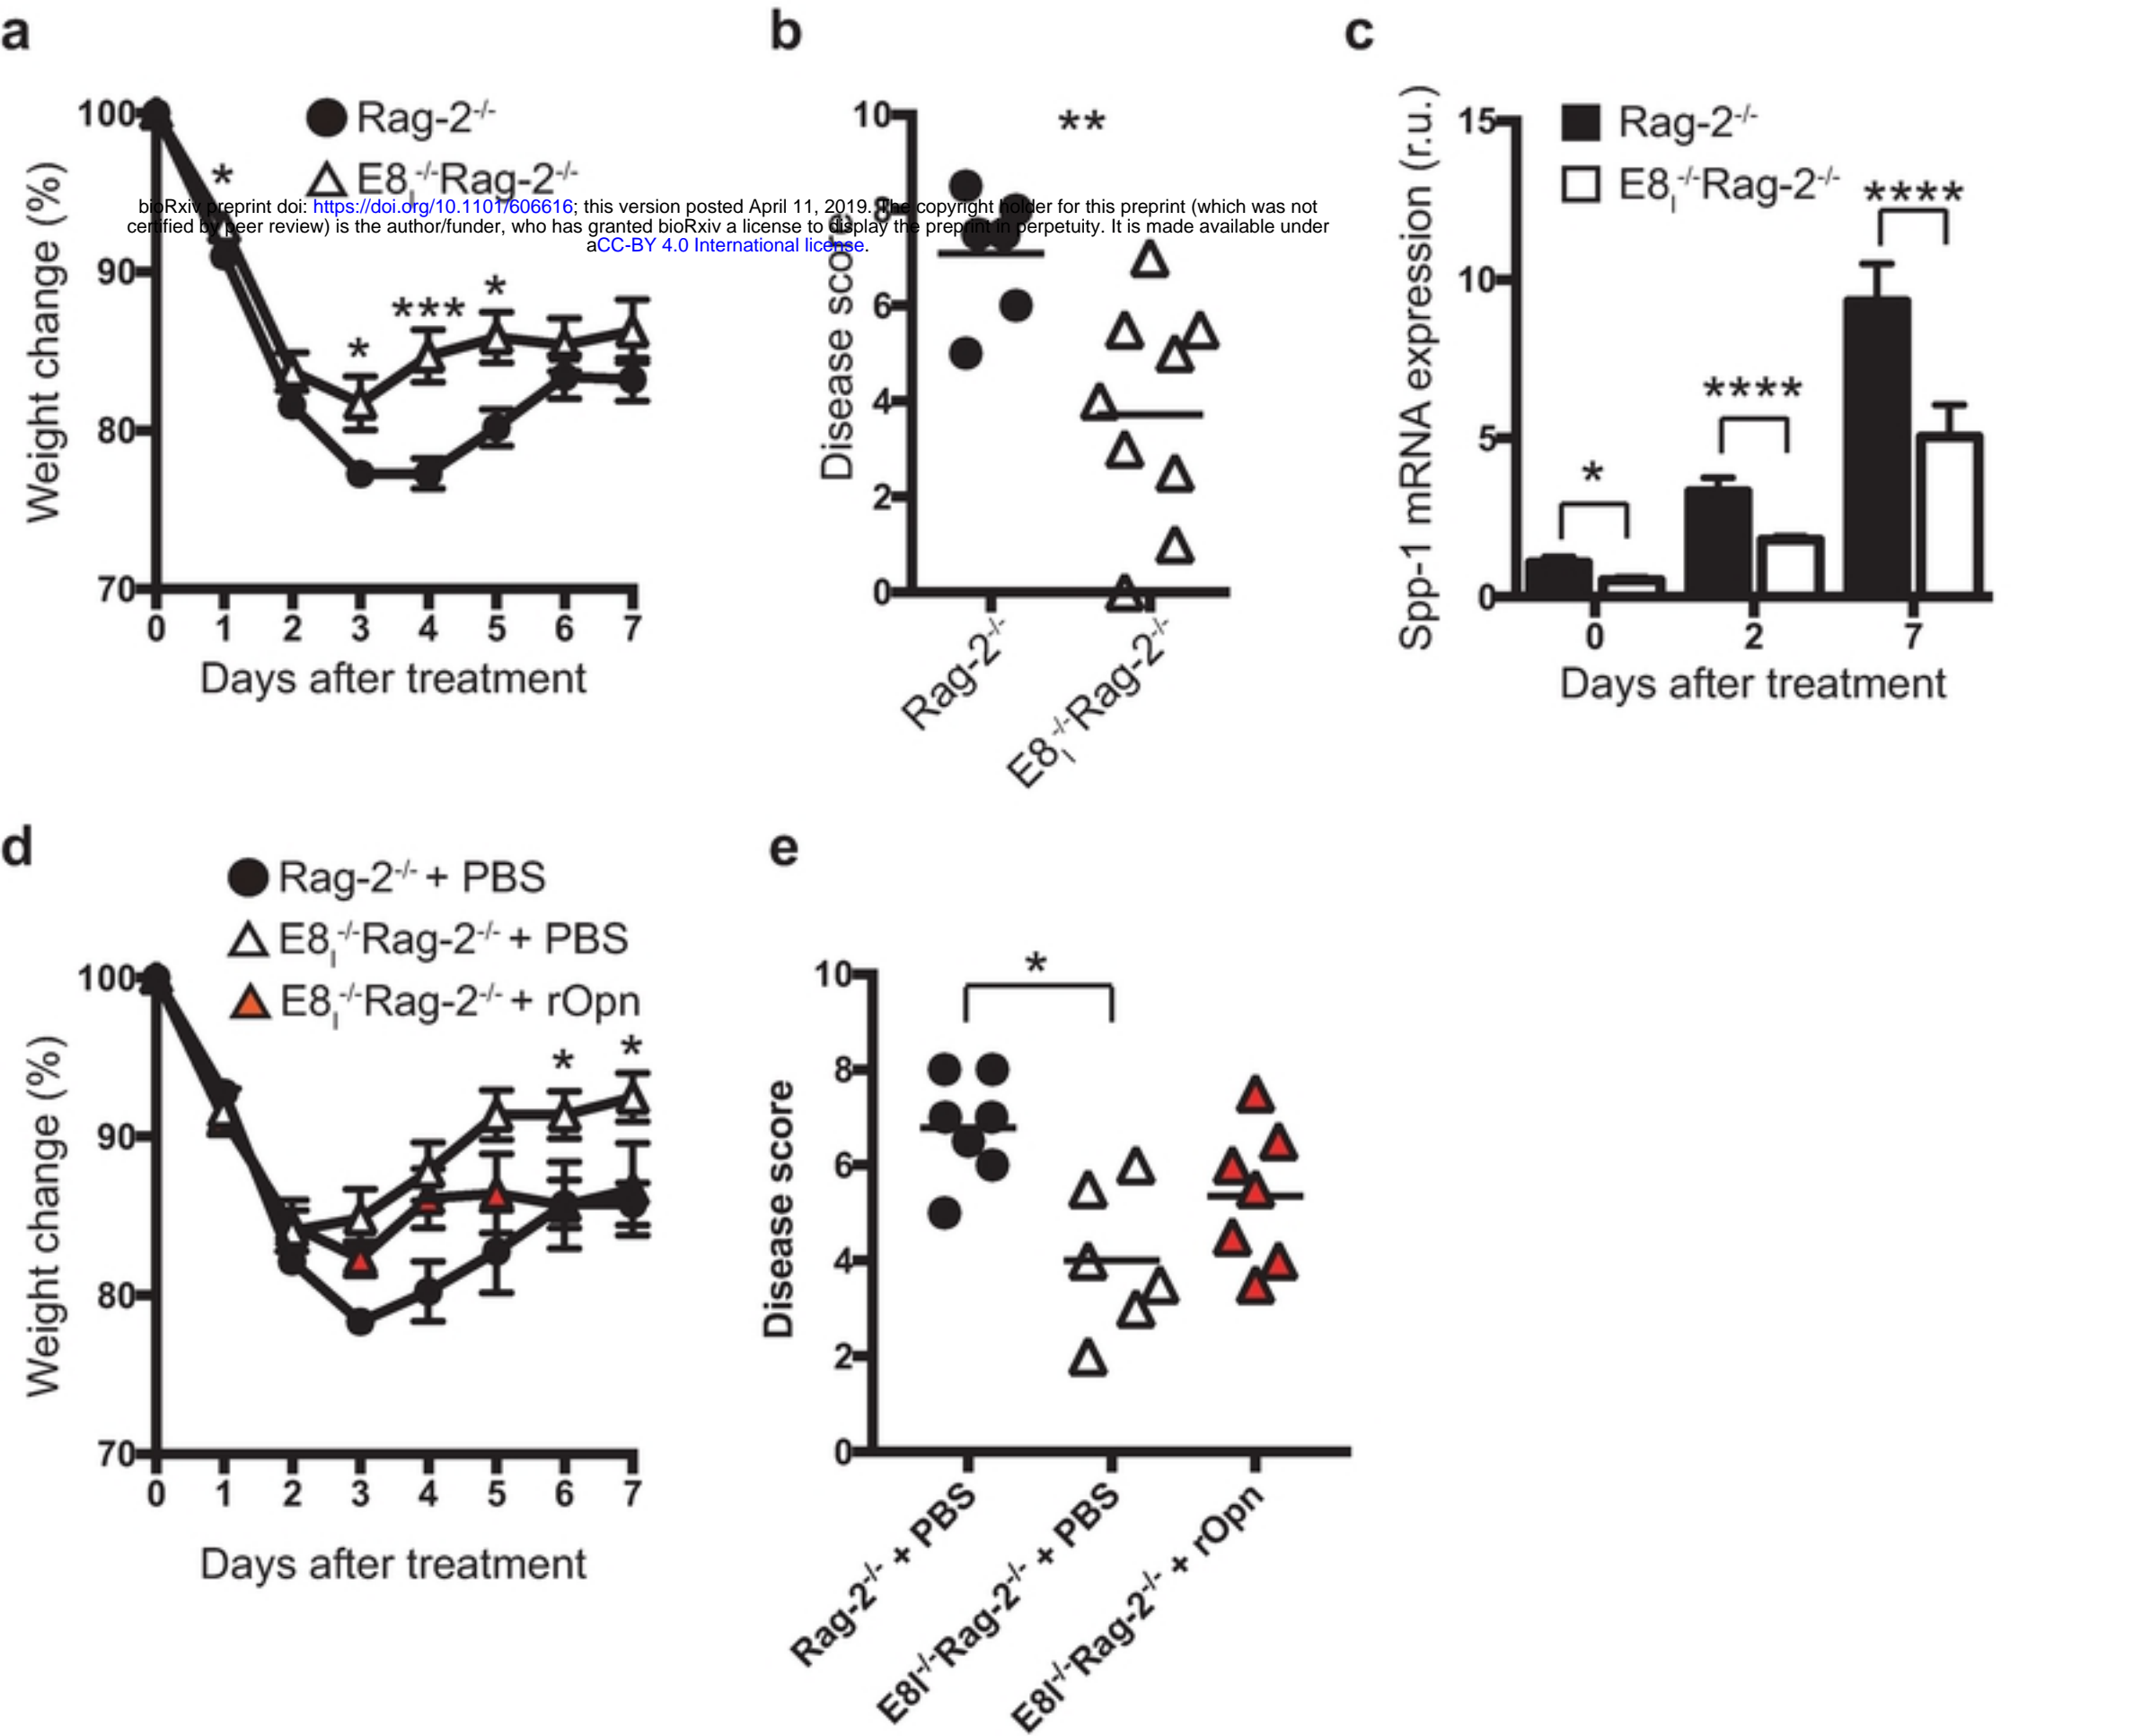

Figure 6

Figure 6
